# Supplementary material for: Theoretical study on porphyrin arch-tapes of carbonyl-inserted seven-membered rings with high nonlinear optical properties
Source: Royal Society of Chemistry journal article supplement (doi:10.1039/d3cp04496c), 2023-01-01
Supplement: d3cp04496c1.pdf [file d3cp04496c1.pdf]

**Theoretical Study on Porphyrin Arch-Tapes of Carbonyl-Inserted  
Seven-Membered Ring with High Nonlinear Optical Properties**

Jin-Ting Ye<sup>a\*</sup>, Li-Hui Wang<sup>a</sup> and Jia-Qi Yu<sup>a\*</sup>,

<sup>a</sup> College of Chemistry and Materials Science, Inner Mongolia Minzu University,  
Tongliao, 028000, China

---

\* Corresponding Author.  
E-mail addresses: [yejt571@nenu.edu.cn](mailto:yejt571@nenu.edu.cn) (J. T. Ye).

It is well known that the NLO properties are induced by nonlinear charge displacements that are generated under a strong electric field of light. In the presence of weak and static electric field, the energy of a molecule is a function of the field strength. The energy of the perturbed system is described by expansion as follows:

$$E = E^0 - \mu_i F_i - \left(\frac{1}{2!}\right) \alpha_{ij} F_i F_j - \left(\frac{1}{3!}\right) \beta_{ijk} F_i F_j F_k - \left(\frac{1}{4!}\right) \gamma_{ijkl} F_i F_j F_k F_l + \dots \quad (1)$$

where  $E^0$  is the molecular energy in the absence of the applied electric field;  $\mu_i$  is the component of the dipole moment along the  $i$  direction;  $F_i$  is the Cartesian component of the applied electric field along the  $i$  direction;  $\alpha_{ij}$ ,  $\beta_{ijk}$  and  $\gamma_{ijkl}$  are the polarizability, first, and second hyperpolarizability tensors, respectively.

The conceptual density functional theory (CDFT)<sup>1,2</sup> originally developed by Robert Parr is a theory framework aiming for unraveling reactivity of chemical systems. CDFT contains numerous concepts and quantities, some of them can be used to predict favorable reactive sites and reactive character, and some of them can compare reactivity among different chemical species. Due to the high popularity and important role of CDFT in quantum chemistry, as well as there are so many meaningful relevant quantities, this method has been used to calculate all global reactive parameters, which were finished by Multiwfn 3.3.8. To yield all below quantities, electronic energy ( $E$ ) and electron density of  $N$ ,  $N+1$  and  $N-1$  electron states must be available. Commonly  $N$  refers to the number of electrons carried by a chemical system at its most stable status. Geometry optimized for  $N$  electrons state is employed for all calculations.

In the section, Vertical ionization potential (VIP):  $E(N-1) - E(N)$ , Vertical electron affinity (VEA):  $E(N) - E(N+1)$ , Mulliken electronegativity ( $\chi$ ):  $(VIP+VEA)/2$ ,

Chemical potential ( $\mu$ ):  $-\chi$ , Hardness ( $\eta$ ): VIP-VEA, which is also equivalent to fundamental gap.<sup>2</sup> Note that according to the convention employed by many CDFT papers, the prefix of 1/2 in original definition of is dropped. Softness ( $S$ ):  $1/\eta$ ,<sup>3</sup> and Electrophilicity index ( $\omega$ ):  $\mu^2/(2\eta)$ .<sup>4</sup>

**Table S1** Frequencies values ( $\text{cm}^{-1}$ ) of all the studied complexes calculated at the B3LYP/6-31G(d)/SDD level.

| Complex | Frequencies                                                                                                                                                                                                                                                                                                                                                                                                                                                                                                                                                                                                                                                                                                                                                                                                                                                                                                                                                                                                                                                                                                                                                                                                                                                                                                    |
|---------|----------------------------------------------------------------------------------------------------------------------------------------------------------------------------------------------------------------------------------------------------------------------------------------------------------------------------------------------------------------------------------------------------------------------------------------------------------------------------------------------------------------------------------------------------------------------------------------------------------------------------------------------------------------------------------------------------------------------------------------------------------------------------------------------------------------------------------------------------------------------------------------------------------------------------------------------------------------------------------------------------------------------------------------------------------------------------------------------------------------------------------------------------------------------------------------------------------------------------------------------------------------------------------------------------------------|
| 1       | 8.64/10.60/14.64/21.36/24.59/28.52/31.55/34.15/35.91/40.44/43.26/<br>44.79/45.54/49.55/50.39/51.85/52.15/56.78/60.15/66.58/69.14/69.25/<br>90.37/99.96/102.17/113.77/118.5/132.37/134.9/144.88/148.32/157.03/<br>175.57/179.85/185.96/193.46/209.91/216.31/216.86/219.22/221.55/<br>228.99/230.17/235.05/247.26/249.4/250.19/252.66/255.98/258.95/<br>262.59/265.35/270.74/285.83/292.67/299.72/303.83/309.97/316.53/<br>316.97/321.91/325.67/328.25/331.76/333.47/337.6/352.3/377.48/<br>406.6/411.11/416.43/417.32/417.6/417.88/418.54/418.89/419.79/<br>426.41/429.76/432.39/453.32/460.32/465.62/472.48/472.89/474.95/<br>477.57/491.28/499.07/507.37/519.05/526.18/529.21/548.1/552.18/<br>566.37/572.11/573.5/574.29/580.17/581.7/595.18/619.08/623.51/<br>634.88/634.91/635.03/635.22/636.31/636.61/656.25/661.05/664.37/<br>667.45/670.78/671.6/674.87/675.23/680.95/683.71/690.14/693.62/<br>694.49/706.27/715.31/715.47/715.94/716.73/716.96/717.02/730.95/<br>732.88/735.15/735.88/745.36/747.5/748.9/764.41/765.35/769.71/<br>772.63/774.21/775.92/781.67/797.52/801.53/803.41/806.5/809.88/<br>810.53/822.94/833.14/836.91/844.28/845.98/847.37/852.98/857.49/<br>858.54/863.26/863.57/863.7/863.86/864.14/864.41/873.05/878.26/<br>889.59/892.7/899.44/902.22/914.16/914.48/916.6/917.64/918.27/ |

918.69/921.1/921.31/938.19/938.62/939.43/939.99/940.04/940.24/  
971.02/971.14/971.24/971.41/971.45/971.51/996.9/996.94/996.96/997/  
997.04/997.17/997.41/1017.31/1017.33/1017.36/1017.38/1017.47/  
1017.7/1025.82/1029.71/1030.95/1033.89/1034.56/1039.11/1041.91/  
1044.33/1046.34/1048.99/1050.71/1055.98/1063.06/1064.81/1068.88/  
1069.63/1076.05/1077.78/1084.59/1108.26/1108.73/1109/1109.22/  
1109.47/1109.53/1111.39/1111.92/1112.83/1112.89/1116.73/1119.62/  
1176.91/1192.77/1192.8/1192.8/1192.81/1192.82/1192.84/1210.54/  
1213.04/1213.85/1213.94/1212.97/1214.13/1214.36/1214.65/1232.36/  
1240.86/1243.04/1253.49/1258.87/1265.32/1270.93/1274.18/1276.33/  
1277.57/1281.39/1292.91/1304.7/1322.22/1325.86/1327.85/1327.99/  
1329.03/1329.72/1330.08/1337.15/1346.01/1347.38/1349.66/1359.72/  
1361.85/1363.38/1363.74/1363.89/1364.16/1364.21/1365.17/1375.75/  
1380.35/1386.01/1393.11/1396.89/1403.74/1406.87/1415.11/1416.12/  
1478.46/1487.26/1487.29/1487.35/1487.66/1487.7/1488.65/1495.2/  
1499.92/1504.3/1508.19/1520.4/1508.19/1520.4/1523.19/1529.96/  
1535.55/1540.89/1542.35/1543.85/1544.87/1546.16/1548/1554.57/  
1557.71/1563.24/1564.23/1567.43/1570.76/1575.11/1591.07/1593.34/  
1595.49/1606.79/1610.27/1612.86/1620.38/1633.12/1633.16/1633.25/  
1633.33/1634.05/1634.67/1658.84/1658.92/1659.02/1659.11/1659.21/  
1659.4/1665.15/3183.02/3183.04/3183.07/3183.11/3183.13/3183.16/  
3190.54/3190.74/3190.77/3190.78/3190.84/3190.89/3200.43/3200.6/

|   |                                                                                                                                                                                                                                                                                                                                                                                                                                                                                                                                                                                                                                                                                                                                                                                                                                                                                                                                                                                                                                                                                                                                                                                                                                                                                                                                                       |
|---|-------------------------------------------------------------------------------------------------------------------------------------------------------------------------------------------------------------------------------------------------------------------------------------------------------------------------------------------------------------------------------------------------------------------------------------------------------------------------------------------------------------------------------------------------------------------------------------------------------------------------------------------------------------------------------------------------------------------------------------------------------------------------------------------------------------------------------------------------------------------------------------------------------------------------------------------------------------------------------------------------------------------------------------------------------------------------------------------------------------------------------------------------------------------------------------------------------------------------------------------------------------------------------------------------------------------------------------------------------|
|   | <p>3200.73/3200.78/3200.81/3200.9/3206.55/3206.82/3206.92/3207.01/<br/> 3207.08/3207.22/3213.46/3213.57/3213.63/3213.65/3213.67/3213.75/<br/> 3272.73/3273.58/3273.58/3273.7/3276.27/3277.15/3280.68/3283.34/<br/> 3290.61/3291.56/3291.59/3291.74/3294.04/3295.16</p>                                                                                                                                                                                                                                                                                                                                                                                                                                                                                                                                                                                                                                                                                                                                                                                                                                                                                                                                                                                                                                                                                |
| 2 | <p>7.43/10.21/14.78/18.41/26.04/30.23/32.21/33.45/38.38/45.05/45.69/47.<br/> 36/51.07/53.44/53.8/55.09/55.4/56.79/64.27/67.62/76.95/78.12/99.15/1<br/> 06.51/111.95/116.39/130.82/143.1/147.98/149.15/159.45/165.1/168.71<br/> /191.29/193.17/196.69/200.57/211.24/218.93/222.65/224.53/233.79/23<br/> 3.97/239.19/242.31/249.54/250.07/255.1/259.57/261.91/266.37/268.53<br/> /268.94/275.33/302.1/303.31/306.93/312.55/314.64/321.27/323.88/327<br/> .75/330.39/335.94/337.33/353.53/357.34/376.94/377.12/403.83/414.74<br/> /417.34/417.98/418.8/419.27/419.27/419.82/421.06/425.47/427.09/449<br/> .74/455.54/459.4/464.55/471.31/474.72/484.69/499.56/503.89/505.55/<br/> 520.35/523/528.91/544.75/545.81/567.11/571.78/575.47/577.22/581.35<br/> /583.52597.44/627.62/634.67/634.73/634.98/635.17/636.09/637.41/655<br/> .01/659.85/664.49/667.89/668.3670.32/672.06/673.02/680.28/685.01/6<br/> 85.31/692.26/697.67/714.28/715.17/715.52/716.21/716.47716.63/720.4<br/> 4/727.47/732.35/733.99/740.47/741.98/743.46/747.29/748.2/765.39/76<br/> 7.34/768.25/775.75/775.93/778.19/782.66/793.51/802.61/803.02/809.0<br/> 5/809.18/833.12/835.68/838.73/841.42/847.77/849.33/852.64/855.26/8<br/> 55.6/862.96/863.11/863.69/863.94/864.57/864.69/866.1/871.79/882.56<br/> /889.41/897.47/902.77/914.32/915.15/917.03/917.04/917.39/917.42/92</p> |

4.71/938.89/939.17/939.89/940.2/940.29/941.04/957.22/964.69/971.84  
/971.85/971.92/971.93/971.98/972.08/996.97/996.98/997.14/997.15/99  
7.16/997.19/1017.21/1017.23/1017.25/1017.29/1017.32/1017.48/  
1029.98/1030.54/1033.83/1034.48/1039.36/1045.1/1046.24/1047.22/10  
48.47/1050.29/1051.34/1052.87/1062.99/1063.79/1067.88/1069.91/107  
4.26/1076.2/1081.81/1108.82/1109.02/1109.42/1109.79/1110.29/1110.  
31/1112.11/1112.2/1113.85/1114.08/1140.26/1171.08/1192.74/1192.8/  
1192.82/1192.83/1192.88/1192.9/1194.5/1201.56/1212.37/1213.45/  
1214.14/1214.27/1214.39/1214.66/1214.86/1214.91/1217.25/1241.76/  
1245.36/1246.81/1255.03/1265.83/1268.6/1272.14/1276.68/1277.33/  
1283.01/1294.44/1300.33/1324.07/1325.88/1326.59/1328.36/1330.15/  
1330.42/1330.63/1330.79/1344.94/1346.45/1350.39/1354.78/1357.08/  
1363.15/1363.77/1364.33/1364.34/1364.57/1364.61/1366.19/1375.19/  
1380.08/1383.26/1391.54/1394.24/1404.03/1407.45/1415.93/1425.21/  
1464.59/1486.92/1486.97/1487.32/1487.54/1487.66/1487.99/1489.73/  
1490.27/1501.78/1505.34/1509.5/1513/1524.5/1524.96/1530.33/1539.6  
8/1540.63/1542.93/1543.87/1545.42/1547.68/1553.68/1554.47/1561.83  
/1566.16/1568.31/1570.32/1574.67/1590.55/1602.16/1603.36/1604.43/  
1608.13/1632.51/1632.54/1632.66/1632.79/1633.24/1633.53/1637.74/  
1646.23/1658.39/1658.51/1658.59/1658.65/1658.77/1658.94/1679.47/  
2996.22/3090.27/3182.96/3182.98/3183.17/3183.18/3183.25/3183.27/  
3191.01/3191.03/3191.08/3191.08/3191.37/3191.39/3201.32/3201.33/

|   |                                                                                                                                                                                                                                                                                                                                                                                                                                                                                                                                                                                                                                                                                                                                                                                                                                                                                                                                                                                                                                                                                                                                                                                                                                                                                                                              |
|---|------------------------------------------------------------------------------------------------------------------------------------------------------------------------------------------------------------------------------------------------------------------------------------------------------------------------------------------------------------------------------------------------------------------------------------------------------------------------------------------------------------------------------------------------------------------------------------------------------------------------------------------------------------------------------------------------------------------------------------------------------------------------------------------------------------------------------------------------------------------------------------------------------------------------------------------------------------------------------------------------------------------------------------------------------------------------------------------------------------------------------------------------------------------------------------------------------------------------------------------------------------------------------------------------------------------------------|
|   | <p>3201.42/3201.46/3201.6/3201.67/3207.65/3207.66/3208.01/3208.06/<br/> 3208.12/3208.19/3213.89/3213.91/3213.97/3214.01/3214.11/3214.17/<br/> 3272.84/3272.84/3273.36/3273.37/3275.06/3275.21/3280.41/3282.2/<br/> 3290.85</p>                                                                                                                                                                                                                                                                                                                                                                                                                                                                                                                                                                                                                                                                                                                                                                                                                                                                                                                                                                                                                                                                                               |
| 3 | <p>7/8.34/10.91/21.97/25.74/29.66/30.77/35.34/37.22/38.9/39.9/40.33/<br/> 47.07/48.4/48.61/50.24/51.29/53.31/54.4/60.12/64.45/76.29/96.24/<br/> 97.27/112.28/114.4/119.54/135.52/140.74/142.55/149.69/169.03/<br/> 170/183.12/193.73/200.68/209.95/220.5/226.28/227.67/229.51/230.32/<br/> 234/242.5/248.28/249.5/254.58/255.27/257.04/258.77/267.02/267.21/<br/> 270.97/289.73/298.94/304.07/308.59/309.7/312.34/322.13/323.31/<br/> 326.07/326.13/329.23/342.16/370.19/387.11/399.08/410.52/415.41/<br/> 416.31/416.59/416.59/416.96/417.09/419.5/420.21/442.4/449.41/455.1<br/> 3/455.25/465.46/466.42/471.06/474.45/490.31/505.93/510.98/521.22/<br/> 526.76/532.3/547.4/549.77/562.29/562.67/565.52/572.49/575.89/579.3<br/> 3/580.36/602.44/605.72/618.42/634.76/634.87/635.07/635.18/635.82/6<br/> 36.04/645.82/657.38/660.89/663.86/667.39/669.3/673.34/675.34/676.2<br/> 3/681.82/688.25/689.13/696.45/705.41/715.18/715.24/716.21/716.74/<br/> 716.81/717.01/731.03/731.18/732.18/740.95/746.07/746.51/752.79/<br/> 759.45/764.6/765.32/768.85/775.07/775.21/776.85/779.43/804.15/804.<br/> 3/810.7/810.73/828.57/843.7/844.66/845.6/846.18/851.73/852.93/855.<br/> 72/856.08/856.69/862.79/862.99/863.52/864.12/864.24/864.49/865.69/<br/> 875.29/889.09/890.71/895.78/905.36/912.73/916.6/916.63/917.72/918.</p> |



24/918.46/930.76/937.79/938.4/938.79/939.34/939.38/939.49/970.17/970.17/970.19/970.2/970.51/970.53/996.78/996.8/996.83/996.84/996.87/996.88/1017.44/1017.44/1017.54/1017.55/1017.59/1017.77/1022.26/1025.39/1025.64/1026.79/1032.45/1033.6/1038.57/1041.71/1045.23/1047.02/1047.63/1048.51/1059.15/1062.23/1066.53/1067.82/1069.47/1074.73/1081.32/1100.41/1108.48/1108.49/1108.64/1108.76/1108.94/1109.03/1114.4/1114.99/1117.1/1117.38/1156.31/1192.73/1192.74/1192.75/1192.75/1192.8/1192.8/1204.62/1206.97/1210.29/1213.37/1213.37/1213.5/1213.5/1213.71/1213.89/1229.82/1231.27/1240.84/1255.03/1264.75/1264.78/1266.43/1268.8/1274.37/1276.6/1278.88/1286.69/1305.78/1320.87/1322.69/1326.03/1327.22/1328.98/1329.16/1329.33/1333.17/1333.61/1342.14/1352.5/1362.55/1363.11/1363.14/1363.33/1363.45/1363.61/1366.38/1376.5/1379.22/1381.27/1387.97/1389.3/1396.47/1404.23/1404.69/1421.16/1425.38/1486.99/1487.41/1487.42/1487.59/1487.67/1487.72/1500.46/1501.45/1504.89/1504.97/1515.17/1527.6/1534.82/1535.19/1541.1/1541.76/1544.11/1545.85/1548.86/1550.66/1555.8/1562.67/1564.47/1571.36/1575.78/1586.01/1587.73/1589.2/1606.24/1607.07/1614.02/1624.87/1629.89/1633.4/1633.49/1633.57/1633.73/1633.86/1635.5/1657.48/1659.1/1659.14/1659.29/1659.41/1659.47/1659.63/1668.52/1673.5/3183.01/3183.02/3183.05/3183.05/3183.09/3183.1/3190.4/3190.4/3190.41/3190.41/3190.59/3190.59/3199.94/3199.94/3200.01/3200.02/3200.24/3200.26/3206.09/3206.09/

|   |                                                                                                                                                                                                                                                                                                                                                                                                                                                                                                                                                                                                                                                                                                                                                                                                                                                                                                                                                                                                                                                                                                                                                                                                                                                                                                                                                                   |
|---|-------------------------------------------------------------------------------------------------------------------------------------------------------------------------------------------------------------------------------------------------------------------------------------------------------------------------------------------------------------------------------------------------------------------------------------------------------------------------------------------------------------------------------------------------------------------------------------------------------------------------------------------------------------------------------------------------------------------------------------------------------------------------------------------------------------------------------------------------------------------------------------------------------------------------------------------------------------------------------------------------------------------------------------------------------------------------------------------------------------------------------------------------------------------------------------------------------------------------------------------------------------------------------------------------------------------------------------------------------------------|
|   | 3206.15/3206.15/3206.41/3206.42/3213.3/3213.31/3213.34/3213.36/<br>3213.43/3213.49/3275.21/3275.21/3275.94/3275.94/3282.73                                                                                                                                                                                                                                                                                                                                                                                                                                                                                                                                                                                                                                                                                                                                                                                                                                                                                                                                                                                                                                                                                                                                                                                                                                        |
| 4 | 5.41/11.62/15.56/18.52/21.42/24.18/28.39/29.86/34.15/34.83/41.05/<br>/44.52/47.24/49.46/51.01/51.55/54.9/55.43/60.83/65.47/66.48/77.52<br>/84.76/88.02/108.71/110.88/125.95/140.63/142.14/143.72/146.75<br>/159.19/164.24/170.95/184.52/190.94/191.61/207.87/214.79/221<br>/222.8/226.9/229.93/233.62/235.68/240.71/248.19/251.63/254.27<br>/260.06/264.2/266.79/270.22/273.77/287.82/299.26/304.86/307.07<br>/313.18/319.28/320.06/326.96/329.09/330.63/333.94/339.62/352.57<br>/369.92/378.63/397.13/404.23/414.38/415.57/416.41/417.01/417.27<br>/418.64/419.87/420.86/421.77/441.26/450.65/459.34/463.85/465.16<br>/469.45/471.1/477.88/498.05/508.02/510.08/525.45/529.31/535.44<br>/542/549.72/557.26/568.01/569.81/573.99/580.91/582.06/584.95<br>/600.27/608.48/629.61/634.54/634.79/635.07/635.32/636.34/639.28<br>/650.4/655.58/661.88/662.7/665.65/669.01/670.73/672.55/674.44<br>/680.76/687.44/690.62/695.67/708.33/714.3/715.49/715.82/716.53<br>/716.92/716.98/717.33/731.45/731.69/738.67/741.74/745.4/747.51<br>/751.12/765.01/765.37/767.26/770.35/773.85/774.71/775.83/787.42<br>/801.5/801.95/808.72/809.16/824.23/837.81/838.7/839.15/845.68<br>/850.14/853.9/855.02/862.34/862.5/863.21/863.61/864.14/864.28<br>/866.02/874.59/882.65/892.25/893.74/897.28/906.66/907.62/910<br>/912.7/914.84/915.36/918.45/918.8/925.8/938.75/939.06/940.1 |

/940.63/940.9/941.38/969.86/970.86/971.66/971.99/972.38/972.49  
/997.45/997.68/997.82/998.02/998.04/998.32/1006.28/1017.21  
/1017.23/1017.28/1017.36/1017.5/1017.68/1032.64/1033.21  
/1035.26/1036.14/1039.24/1045.79/1046.41/1047.44/1049.62  
/1050.45/1052.34/1054.75/1063.07/1065.49/1068.92/1070.64  
/1077/1077.39/1083.2/1107.59/1107.99/1108.35/1108.86/1109.72  
/1110.08/1111.59/1111.85/1112.79/1113.07/1135.45/1180.15  
/1187.93/1192.95/1193.05/1193.09/1193.14/1193.43/1193.47  
/1203.29/1210.92/1213.04/1213.73/1214.03/1214.52/1214.85  
/1215.3/1221.61/1234.21/1243.13/1252.36/1259.95/1267.72  
/1269.87/1275.32/1276.25/1284.2/1289.14/1296.85/1301.37  
/1325.12/1325.65/1326.91/1327.99/1328.65/1328.97/1330.71  
/1330.93/1346.84/1347.72/1355.82/1360.29/1362.34/1362.59  
/1363.43/1364.32/1364.83/1365.06/1365.66/1366.18/1380.08  
/1383.97/1394.05/1395.86/1404.93/1406.97/1420.34/1424.55  
/1457.86/1484.03/1484.52/1487.18/1487.25/1487.37/1487.69  
/1488.1/1488.17/1500.85/1506.38/1509.48/1518.65/1520.6  
/1528.2/1535.03/1538.88/1542.33/1543.54/1545.54/1546.67  
/1547.41/1552.37/1554.58/1561.12/1565.82/1567.14/1569.81  
/1590.25/1591.35/1594.65/1599.94/1604.97/1605.43/1616.04  
/1632.95/1633.27/1633.36/1633.52/1634.04/1634.22/1658.53  
/1658.8/1658.86/1659.22/1659.56/1659.86/1686.18/1716.87

|        |                                                                                                                                                                                                                                                                                                                                                                                                                                                                                                                                                                                                                                                                                                                                                                                                                                                                                                                                                                                                                                                                                                                                                                        |
|--------|------------------------------------------------------------------------------------------------------------------------------------------------------------------------------------------------------------------------------------------------------------------------------------------------------------------------------------------------------------------------------------------------------------------------------------------------------------------------------------------------------------------------------------------------------------------------------------------------------------------------------------------------------------------------------------------------------------------------------------------------------------------------------------------------------------------------------------------------------------------------------------------------------------------------------------------------------------------------------------------------------------------------------------------------------------------------------------------------------------------------------------------------------------------------|
|        | <p>/3183.23/3183.44/3183.66/3183.9/3184.7/3184.79/3190.27</p> <p>/3190.63/3190.95/3191.5/3192.54/3192.81/3199.6/3200.1</p> <p>/3200.44/3201.42/3201.91/3202.28/3205.69/3206.2/3206.61</p> <p>/3207.61/3208.43/3208.9/3213.44/3213.62/3213.81/3214.23</p> <p>/3215.12/3215.39/3271.52/3272.75/3273.33/3273.93/3283.99</p> <p>/3286.47/3289.48/3290.53/3291.43/3291.73/3305.58/3306.24</p>                                                                                                                                                                                                                                                                                                                                                                                                                                                                                                                                                                                                                                                                                                                                                                               |
| 5-anti | <p>4.62/5.89/8.14/12.45/13.8/18.37/20.74/21.3/21.35/26.17/28.02/31.27</p> <p>/34.25/34.33/39.88/45.83/46.51/47.14/48.96/50.8/51.75/53.67/54.04</p> <p>/55.45/57.22/58.38/63.07/66.09/66.1/73.9/81.56/88.76/103.05/107.89</p> <p>/110.54/116.52/117.89/119.98/128.33/141.16/142.3/147.03/150.38</p> <p>/151.53/160.38/167.68/169.85/179.34/180.32/189.67/191.38/199.81</p> <p>/205.12/206.1/211.84/218.61/218.66/221.27/224.94/225.23/228.36</p> <p>/228.82/238.63/239.65/245.39/250.16/251.17/254.45/255.08/255.82</p> <p>/258.91/261.35/266.78/267.25/268.81/273.11/275.19/279.93/285.45</p> <p>/299.89/300.93/306.21/309.99/311.99/319.1/320.95/323.55/324.88</p> <p>/328.37/330.3/333.78/341.01/341.79/351.57/356.24/357.97/366.6</p> <p>/369.52/371.16/385.9/399.27/402.47/414.8/414.85/415.2/415.4</p> <p>/418.48/418.89/419.56/419.72/420.15/421.14/423.07/424.35</p> <p>/426.71/441.23/449.77/455.59/457.19/462.21/462.37/468.46/473.33</p> <p>/478.81/479.55/490.32/499.96/502.55/507.59/512.36/515.11/522.29</p> <p>/526.95/529.22/539.13/545.48/547.97/553.06/555.78/564.3/566.89</p> <p>/572.51/575.09/575.52/579.17/582.05/582.28/600.15/600.16/608.87</p> |

/613.77/627.27/627.58/634.71/634.71/634.78/635.12/635.28/635.55  
/637.22/637.68/656.17/658.32/662.94/663.71/664.84/666.57/668.4  
/668.57/672.64/672.66/673.93/680.24/682.97/684.93/686.61/687.25  
/694.04/697.13/714.39/714.6/715.17/715.18/716.1/716.14/716.74  
/716.76/719.57/722.14/728.7/728.7/731.26/731.62/737.55/739.82  
/741.4/743.34/745.12/745.48/747.89/749.33/765.21/765.39/767.31  
/770.74/773.5/774.59/777.05/777.31/782.14/782.23/793.33/794.55  
/801.22/801.23/808.35/808.4/831.82/832.48/833.96/837.22/837.92  
/842.78/842.89/844.88/848.15/848.86/851.43/852.67/854.86/855.35  
/858.61/858.74/863.11/863.12/863.72/863.8/864.8/865.05/865.55  
/865.94/870.35/873.54/881.4/888.65/897/898.99/903.06/911.48  
/913.23/913.24/915.18/915.34/917.53/917.57/927.09/933.28/938.09  
/938.49/939.62/939.77/940.27/940.32/940.63/941.86/955.14/960.84  
/963.42/964.52/969.59/969.59/971.77/971.78/972/972/973.08/973.14  
/996.73/996.73/997.06/997.06/997.23/997.24/997.5/997.53/1017.03  
/1017.08/1017.25/1017.26/1017.34/1017.36/1017.56/1017.62/1031.19  
/1031.64/1035.05/1035.07/1037.36/1037.41/1045.42/1045.84/1046.6  
/1047.25/1047.99/1048.8/1050.54/1052.29/1053.24/1053.69/1063.18  
/1063.31/1065.73/1066.75/1069.78/1070.07/1075.14/1075.33/1080.67  
/1082.57/1107.51/1107.54/1108.79/1108.81/1109.59/1109.63/1111.32  
/1111.44/1111.61/1111.62/1113.22/1113.27/1138.61/1141.07/1169.2  
/1172.49/1189.43/1190.35/1192.72/1192.72/1192.8/1192.8/1192.9

/1192.9/1192.95/1192.97/1200.03/1205.13/1208.84/1212.46/1213.06  
/1213.69/1214.1/1214.19/1214.36/1214.42/1215.03/1215.14/1215.74  
/1220.79/1231.7/1240.74/1247.32/1247.35/1253.42/1253.53/1260.59  
/1267.09/1267.42/1270.64/1275.57/1276.39/1277.62/1280.35/1282.98  
/1290.7/1297.11/1299.83/1313.54/1323.41/1324.24/1326.58/1326.61  
/1327.83/1328.67/1329.93/1330.32/1330.42/1331.2/1341.55/1344.89  
/1346.08/1348.23/1349.23/1350.97/1354.5/1357.55/1359.94/1362.88  
/1362.9/1363.79/1363.96/1364.47/1364.48/1364.99/1365.27/1370.88  
/1373.43/1377.38/1382.52/1382.88/1391.22/1393.9/1394.16/1401.37  
/1406.35/1407.11/1417.64/1418.87/1430.6/1458.06/1466.68/1482.69  
/1485.14/1486.86/1487.19/1487.24/1487.36/1487.52/1487.73/1487.91  
/1488.44/1490.05/1498.26/1500.72/1501.13/1507.68/1507.84/1513.61  
/1520.26/1525.09/1525.41/1531.07/1532.03/1538.68/1540.22/1541.77  
/1542.77/1545.29/1545.37/1546.88/1548.2/1550.49/1553.12/1556.42  
/1563.26/1563.66/1565.84/1568.75/1571.4/1573.94/1576.39/1587.02  
/1591.67/1604.53/1604.58/1606.2/1606.9/1630.49/1630.83/1632.38  
/1632.76/1633.06/1633.2/1633.26/1633.98/1634.08/1634.32/1643.6  
/1644.56/1657.97/1658.03/1658.51/1658.52/1658.81/1658.86/1659.79  
/1659.82/1674.78/1674.84/2994.74/2994.76/3089.9/3089.92/3182.71  
/3182.71/3183.12/3183.12/3183.29/3183.29/3183.48/3183.49/3189.98  
/3189.98/3191.17/3191.17/3191.19/3191.19/3192.06/3192.06/3199.31  
/3199.32/3201.24/3201.25/3201.56/3201.57/3202.76/3202.78/3205.6

|        |                                                                                                                                                                                                                                                                                                                                                                                                                                                                                                                                                                                                                                                                                                                                                                                                                                                                                                                                                                                                                                                                                                                                                                                                                                                                                                                                                                                                                    |
|--------|--------------------------------------------------------------------------------------------------------------------------------------------------------------------------------------------------------------------------------------------------------------------------------------------------------------------------------------------------------------------------------------------------------------------------------------------------------------------------------------------------------------------------------------------------------------------------------------------------------------------------------------------------------------------------------------------------------------------------------------------------------------------------------------------------------------------------------------------------------------------------------------------------------------------------------------------------------------------------------------------------------------------------------------------------------------------------------------------------------------------------------------------------------------------------------------------------------------------------------------------------------------------------------------------------------------------------------------------------------------------------------------------------------------------|
|        | <p>/3205.61/3207.53/3207.53/3208.12/3208.12/3209.79/3209.8/3212.98</p> <p>/3212.99/3213.9/3213.92/3214.09/3214.1/3214.95/3214.98/3271.45</p> <p>/3271.45/3273.16/3273.16/3274.11/3274.11/3275.68/3275.69/3279.65</p>                                                                                                                                                                                                                                                                                                                                                                                                                                                                                                                                                                                                                                                                                                                                                                                                                                                                                                                                                                                                                                                                                                                                                                                               |
| 6-anti | <p>3.74/6.58/7.08/13.71/15.61/18.87/21.82/25.38/25.72/28.68/28.82/31.19</p> <p>/34.78/35.48/39.86/44.16/46.29/46.4348.81/50.32/50.7/53.33/53.8/56.0</p> <p>5/56.86/57.9/62.47/64.99/66.31/68.49/71.94/84.8/84.81/95.49/107.05</p> <p>/109.07/114/117.07/118.88/128.48/136.18/142.06/147.41/148.84/150.0</p> <p>6/163.05/165.42/168.59/172.15/177.28/185.07/191.7/191.99/198.67/20</p> <p>7.1/210.09/214.52/216.13/221.68/224.53/226.46/226.86/232.6/232.78/</p> <p>239.87/242.23/244.04/250.55/251.98/252.99/257.11/258.88/261.44/265</p> <p>.28/268.15/269.98/273.59/276.05/280.37/290.01/298.46/301.37/302.98</p> <p>/313.73/314.61/317.18/320.05/320.3/326.64/327.48/328.43/329.96</p> <p>/331.53/343.1/344.55/353.84/365.01/368.78/372.33/372.49/393.83</p> <p>/399.48/401.52/408.35/415.67/415.76/416.38/416.77/416.8/419.1</p> <p>/419.25/420.43/420.91/421.53/422.95/433.87/437.8/442.79/446.71</p> <p>/454.95/455.5/464.84/465.87/470.41/470.71/470.82/479.57/491.51</p> <p>/498.98/500.89/502.34/509.82/511.68/525.59/529.63/534.31/535.21</p> <p>/546.17/548.11/557.87/562.02/565.63/569.02/577.22/579.06/579.08</p> <p>/583/584.06/586.89/602.04/603.75/607.49/614.91/629.7/630.21</p> <p>/634.47/634.54/634.69/635.06/635.29/635.77/637.46/639.9/651.01</p> <p>/653.58/656.98/661.46/661.6/662.7/663.89/667.54/668.46/669.18</p> <p>/672.28/672.56/680.44/681.47/685.29/689.87/693.6/695.53/705.68</p> |

/711.19/713.71/715.15/715.59/716.05/716.08/716.5/716.65/717  
/717.11/717.92/731.59/731.65/738.38/739.96/741.2/744.8/745.38  
/746.96/749.04/751.55/764.95/765.66/766.03/768.83/771.05/771.55  
/774.77/775.19/775.93/777.82/787.64/787.87/801.89/801.9/809.19  
/809.23/822.09/827.19/834.47/834.53/836.17/838.61/839.24/844.91  
/845.5/850.04/853.37/854.14/858.3/859.74/862.95/862.98/863.53  
/863.77/863.9/864.02/864.38/864.52/873.64/877.66/881.88/891.87  
/893.75/894.13/897.06/897.5/907.47/907.96/907.96/909.83/911.93  
/915.3/915.44/916.62/918.6/918.68/930.2/931.11/939.29/939.55  
/940.61/940.8/941.22/941.3/942.64/943.66/971.05/971.06/972.34  
/972.35/972.65/972.66/974.3/974.33/998.11/998.12/998.33/998.34  
/998.57/998.61/999.37/999.42/1004.71/1009.06/1016.97/1017.07  
/1017.22/1017.24/1017.24/1017.28/1017.43/1017.51/1033.27  
/1033.76/1036.59/1036.61/1037.83/1038.21/1046.23/1046.33  
/1048.21/1049.03/1049.97/1050.25/1051.13/1053.74/1055.91  
/1056.23/1063.61/1064.59/1068.19/1068.29/1070.95/1071.97  
/1076.74/1077.27/1082.16/1083.76/1108.05/1108.1/1109.12  
/1109.18/1110.04/1110.11/1111.84/1111.94/1112.3/1112.34  
/1113.09/1113.26/1134.93/1135.75/1170.56/1179.85/1187.18  
/1191.68/1193.24/1193.24/1193.3/1193.3/1193.6/1193.61  
/1193.78/1193.79/1203.89/1210.44/1213.57/1213.83/1214.49  
/1214.59/1215.23/1215.3/1215.79/1215.92/1217.27/1217.92



/1228.33/1241.37/1248.3/1251.8/1253.88/1258.3/1265.71  
/1267.15/1269.9/1274.53/1275.46/1278.46/1283.74/1287.32  
/1289.13/1294.15/1298.71/1300.67/1314.04/1322.93/1324.09  
/1327.32/1327.41/1328.38/1328.86/1330.41/1330.53/1331.81  
/1333.07/1343.21/1347.26/1347.58/1352.3/1353.8/1354.81  
/1361.27/1362.03/1362.86/1363.75/1364.19/1365.04/1365.18  
/1365.71/1366.02/1366.26/1366.5/1376.4/1384.59/1385.2  
/1391.69/1394.26/1397.42/1404.27/1405.85/1406.51/1419.08  
/1421.82/1427.25/1449.2/1460.1/1477.75/1481.64/1483.4  
/1487.04/1487.1/1487.31/1487.39/1487.61/1487.83/1487.99  
/1488.08/1493.53/1501.35/1505.7/1506.51/1512.92/1519.58  
/1519.68/1525.3/1525.55/1533.56/1537.76/1539.09/1541.82  
/1544.04/1544.52/1544.91/1545.73/1547.57/1548.14/1548.59  
/1553.98/1554.46/1556.04/1562.57/1565.43/1568.25/1568.77  
/1585.19/1585.2/1586.38/1591.39/1593.95/1598.5/1601.57  
/1602.11/1609.85/1613.37/1632.27/1632.57/1632.99/1633.02  
/1633.35/1633.36/1634.08/1634.11/1657.93/1657.97/1658.58  
/1658.58/1658.84/1658.88/1659.52/1659.55/1681.31/1681.79  
/1715.85/1716.48/3183.98/3183.99/3184.31/3184.31/3185.13  
/3185.14/3185.86/3185.87/3190.98/3190.98/3191.78/3191.78  
/3193.1/3193.11/3194.17/3194.18/3200.11/3200.11/3201.45  
/3201.46/3202.43/3202.44/3203.78/3203.8/3206.37/3206.38

|        |                                                                                                                                                                                                                                                                                                                                                                                                                                                                                                                                                                                                                                                                                                                                                                                                                                                                                                                                                                                                                                                                                                                                                                                                                                                                                                                       |
|--------|-----------------------------------------------------------------------------------------------------------------------------------------------------------------------------------------------------------------------------------------------------------------------------------------------------------------------------------------------------------------------------------------------------------------------------------------------------------------------------------------------------------------------------------------------------------------------------------------------------------------------------------------------------------------------------------------------------------------------------------------------------------------------------------------------------------------------------------------------------------------------------------------------------------------------------------------------------------------------------------------------------------------------------------------------------------------------------------------------------------------------------------------------------------------------------------------------------------------------------------------------------------------------------------------------------------------------|
|        | <p>/3207.62/3207.63/3208.96/3208.97/3210.65/3210.66/3213.91</p> <p>/3213.92/3214.43/3214.45/3215.52/3215.53/3216.39/3216.41</p> <p>/3272.45/3272.46/3274.32/3274.32/3282.08/3282.08/3286.95</p> <p>/3286.97/3290.24/3290.25/3292.07/3292.08/3304.9/3304.91</p>                                                                                                                                                                                                                                                                                                                                                                                                                                                                                                                                                                                                                                                                                                                                                                                                                                                                                                                                                                                                                                                        |
| 7-anti | <p>3.55/5.65/7.17/11.18/13.49/19.32/20.99/25.67/26.25/27.01/31.3/34.15</p> <p>/35.95/39.48/46.52/47.29/47.6/49.64/50.04/50.7/52.06/53.13/53.79</p> <p>/55.05/56.6/57.68/59.84/62.19/64.42/69.12/73.84/83.95/85.35/90.96</p> <p>/97.03/99.35/101.48/102.01/109.35/114.71/124.26/128.33/131.74</p> <p>/140.35/144.46/145.18/154.89/159.43/160.77/163.7/170.33/173.26</p> <p>/183.18/185.32/189.6/190.26/195.64/197.7/200.33/201.32/203.05</p> <p>/204.24/205.19/206.4/207.27/211.42/214.08/217.53/219.27/222.35</p> <p>/225.07/226.08/230.39/232.84/238.02/242.75/242.87/245.61/251.42</p> <p>/258.43/261.05/267.06/271.13/281.27/288.16/290.2/296.01/298.84</p> <p>/306.21/310.6/311.41/321.35/327.67/331.1/331.84/339.41/343.66</p> <p>/351.43/354.03/357.89/383.64/384.78/390.15/395.14/403.8/409.81</p> <p>/411.89/415.02/417.87/418.34/418.83/419.17/419.43/420.06/420.8</p> <p>/428.43/430.67/435.32/438.91/442.19/442.96/450.56/450.8/453.97</p> <p>/456.67/461.21/466.66/469.65/484.22/493.64/496.89/504.35/508.78</p> <p>/515.78/524.14/529.25/531.55/542.5/547.67/548.94/552.4/569.59</p> <p>/572.48/572.82/576.59/577.88/579.56/582.28/583.45/589.33/591.45</p> <p>/609.26/617.28/621.73/622.73/634.42/634.52/634.7/634.94/635.11</p> <p>/635.19/635.74/635.97/647.49/650.92/655.47/659.51/666.87/667.23</p> |

/671.41/672.99/676.44/678.46/681.55/682.73/683.89/685.27/686.25  
/690.08/692.12/694.84/709.11/709.75/714.84/715.12/715.15/715.46  
/716.27/716.35/716.82/716.87/721.15/725.22/736.72/737.12/739.97  
/743.72/744.8/745.21/746.76/748.92/750.64/752.66/766.95/767.31  
/767.89/770.58/772.01/774.76/776.01/776.78/778.96/779.13/789.54  
/789.67/808.32/808.9/812.9/813.09/816.48/819.7/831.08/834.08  
/838.26/839.31/839.94/845.27/846.7/847.62/850.51/850.86/855.2  
/857.15/862.23/862.39/863.02/863.17/863.32/863.53/863.81/864.07  
/869.65/874.59/879.98/885.93/886.76/889.65/896.73/897.2/900.42  
/901.21/907.11/908.52/910.29/912.75/920.88/921.85/923.08/923.78  
/925.2/927.82/938.37/939.12/939.6/940.05/940.37/940.47/941.39  
/942.08/969.65/971.48/971.52/971.6/971.7/971.76/973/973.16/  
/989.35/996.77/997.08/997.46/997.55/997.63/997.88/997.98/998.47  
/998.67/1016.77/1016.84/1017.02/1017.06/1017.1/1017.14/1017.23  
/1017.52/1025.08/1025.48/1027.32/1027.75/1031.2/1033.42/1037.95  
/1038.44/1040.8/1043.94/1044.6/1045.47/1046.3/1047.75/1050.94  
/1053.94/1062.4/1062.75/1063.72/1064.08/1064.76/1066.66/1069.11  
/1069.6/1072.97/1074.55/1107.76/1108.75/1108.83/1109.46/1110.1  
/1110.47/1111.55/1112.24/1112.39/1112.62/1113.08/1113.56/1126.44  
/1127.7/1167.79/1177.42/1183.04/1185.15/1192.84/1192.96/1193.03  
/1193.07/1193.38/1193.41/1193.56/1193.58/1198.02/1200.24/1207.66  
/1209.9/1213.28/1214.23/1214.29/1214.52/1215/1215.16/1215.8

/1215.86/1220.9/1225.22/1227.91/1242.41/1250.57/1253.38/1254.21  
/1259.89/1260.76/1266.96/1269.75/1275.39/1276.22/1277.59/1280.56  
/1285.77/1290.36/1292.75/1305.88/1310.44/1312.33/1317.57/1319.4  
/1322.93/1326.47/1327.23/1327.79/1328.14/1329.51/1330.39/1332.72  
/1334.81/1335.99/1336.97/1343.12/1351.46/1352.06/1354.13/1360.85  
/1362.5/1363.14/1364.08/1364.34/1364.58/1364.81/1365.04/1365.57  
/1365.78/1366.48/1372.68/1375.46/1379.35/1385.09/1391.85/1393.63  
/1402.26/1407.1/1409.81/1416.11/1432.44/1446.28/1451.1/1452.35  
/1464.24/1481.38/1482.6/1483.17/1485.27/1486.59/1487.28/1487.32  
/1487.41/1487.48/1487.52/1487.89/1488.68/1494/1495.01/1501.11  
/1503.8/1505.53/1512.72/1514.38/1527.17/1528.5/1534.03/1541.28  
/1541.31/1541.36/1541.52/1541.73/1542.34/1543.04/1543.36/1544.3  
/1546.71/1554.78/1556.24/1572.95/1573.52/1576.67/1578.54/1580.57  
/1584.04/1586.29/1587.73/1598.42/1602.63/1631.52/1631.7/1632.2  
/1632.38/1632.46/1632.78/1632.79/1633.71/1656.79/1656.83/1657.3  
/1657.48/1657.72/1657.9/1658.09/1658.77/1686.02/1687.12/1728.45  
/1729.65/3183.41/3183.92/3183.92/3184.05/3185.13/3185.14/3185.61  
/3185.61/3190.41/3191.39/3191.47/3191.62/3193.13/3193.24/3194.11  
/3194.15/3199.67/3201.14/3201.29/3201.59/3202.94/3203.19/3204.1  
/3204.16/3205.88/3207.25/3207.36/3207.69/3209.34/3209.65/3210.92  
/3211/3213.47/3214.12/3214.16/3214.33/3215.54/3215.65/3216.29  
/3216.37/3271.75/3272.95/3274.03/3274.14/3283.53/3283.69/3286.85

|  |                                                               |
|--|---------------------------------------------------------------|
|  | /3287.04/3289.35/3290.58/3291.25/3291.38/3300.86/3301/3301.42 |
|  | /3302.9                                                       |

**Table S2.** Selected values of selected bond lengths (Å), angles (deg) and symmetry of the molecular structures of complexes **1–7-anti**

| Complex  | <b>1</b> | <b>2</b> | <b>3</b> | <b>4</b>      | <b>5-anti</b> | <b>6-anti</b> | <b>7-anti</b> |
|----------|----------|----------|----------|---------------|---------------|---------------|---------------|
| C1-B     | -        | 1.492    | -        | 1.465 (1.464) | 1.492         | 1.464         | 1.461         |
| C2-B     | -        | 1.492    | -        | 1.465 (1.457) | 1.493         | 1.467         | 1.465         |
| N3-M     | 1.925    | 1.915    | 1.961    | 1.903 (1.884) | 1.904         | 1.888         | 1.989         |
| N4-M     | 1.939    | 1.940    | 1.959    | 1.933 (1.911) | 1.936         | 1.930         | 2.074         |
| N1-M     | 1.936    | 1.937    | 1.956    | 1.924 (1.905) | 1.904         | 1.888         | 1.989         |
| N2-M     | 1.950    | 1.944    | 1.961    | 1.936 (1.928) | 1.936         | 1.930         | 2.074         |
| $\theta$ | -        | 96 (97)  | 25       | 94 (84)       | 151           | 152 (138)     | 104 (97)      |
| Symmetry | $C_1$    | $C_1$    | $C_2$    | $C_1$         | $C_2$         | $C_1$         | $C_1$         |

<sup>a</sup>Previously reported experimental data is in parentheses.

**Table S3.** Total polarizability  $\alpha$  (a.u.) and second hyperpolarizability  $\gamma$  ( $10^5$  a.u.) of the studied complexes computed at various levels of theory.

| Complex | Functionals | $\alpha$ | $\gamma$ | $\gamma_{xxxx}$ | $\gamma_{yyyy}$ | $\gamma_{zzzz}$ |
|---------|-------------|----------|----------|-----------------|-----------------|-----------------|
| 1       | CAM-B3LYP   | 1834.1   | 138.9    | 641.0           | 29.3            | 1.5             |
|         | M06-2X      | 1848.2   | 146.8    | 677.0           | 30.9            | 1.4             |
| 2       | CAM-B3LYP   | 1940.1   | 167.5    | 742.5           | 36.1            | 3.8             |
|         | M06-2X      | 1956.8   | 172.7    | 764.0           | 38.3            | 4.0             |
| 3       | CAM-B3LYP   | 1943.0   | 167.1    | 771.1           | 26.1            | 0.5             |
|         | M06-2X      | 1959.5   | 173.2    | 800.6           | 28.2            | 0.4             |
| 4       | CAM-B3LYP   | 1983.4   | 182.5    | 789.4           | 26.9            | 4.0             |
|         | M06-2X      | 1997.5   | 187.4    | 807.9           | 28.2            | 4.1             |
| 5-anti  | CAM-B3LYP   | 3365.4   | 1113.9   | 4984.6          | 45.2            | 55.2            |
|         | M06-2X      | 3416.1   | 1175.5   | 5276.9          | 48.4            | 57.1            |
| 6-anti  | CAM-B3LYP   | 3723.1   | 1344.6   | 6844.3          | 44.1            | 67.7            |
|         | M06-2X      | 3764.8   | 1549.6   | 7054.7          | 47.3            | 69.6            |
| 7-anti  | CAM-B3LYP   | 4668.7   | 1584.3   | 7846.9          | 64.0            | 27.5            |
|         | M06-2X      | 4551.7   | 2101.3   | 10240.5         | 68.7            | 27.8            |

**Table S4.** The energy ( $\Delta E$ , eV), the absorption wavelength ( $\lambda$ , nm), oscillator strength ( $f_0$ ) and major contribution for complexes **1** and **6-anti** using TD- $\omega$ B97XD/CAM-B3LYP with 6-31G(d,p) basis set.

| Complex       | Method         | State | $\lambda$              | $\Delta E$ | $f_0$ | MO transition                   |
|---------------|----------------|-------|------------------------|------------|-------|---------------------------------|
| <b>1</b>      | $\omega$ B97XD | Q     | 723 (736) <sup>a</sup> | 1.715      | 0.566 | <sup>b</sup> H→L (74%)          |
|               |                | Soret | 440 (488)              | 2.817      | 2.128 | H-1→L+1 (49%),<br>H-2→L+2 (32%) |
|               | CAM-B3LYP      | Q     | 717 (736) <sup>a</sup> | 1.729      | 0.576 | <sup>b</sup> H→L (75%)          |
|               |                | Soret | 445 (488)              | 2.785      | 2.073 | H-1→L+1 (55%),<br>H-2→L+2 (28%) |
| <b>6-anti</b> | $\omega$ B97XD | Q     | 1235 (1254)            | 1.004      | 1.706 | H→L (88%)                       |
|               |                | Soret | 481 (617)              | 2.578      | 2.405 | H-1→L+2 (47%),                  |
|               | CAM-B3LYP      | Q     | 1199 (1254)            | 1.034      | 1.209 | H→L (92%)                       |
|               |                | Soret | 491 (617)              | 2.520      | 2.270 | H-1->L+2 (54%)                  |

<sup>a</sup>Previously reported experimental data is in parentheses. <sup>b</sup>H = HOMO, H-1 = HOMO-1, and L = LUMO.

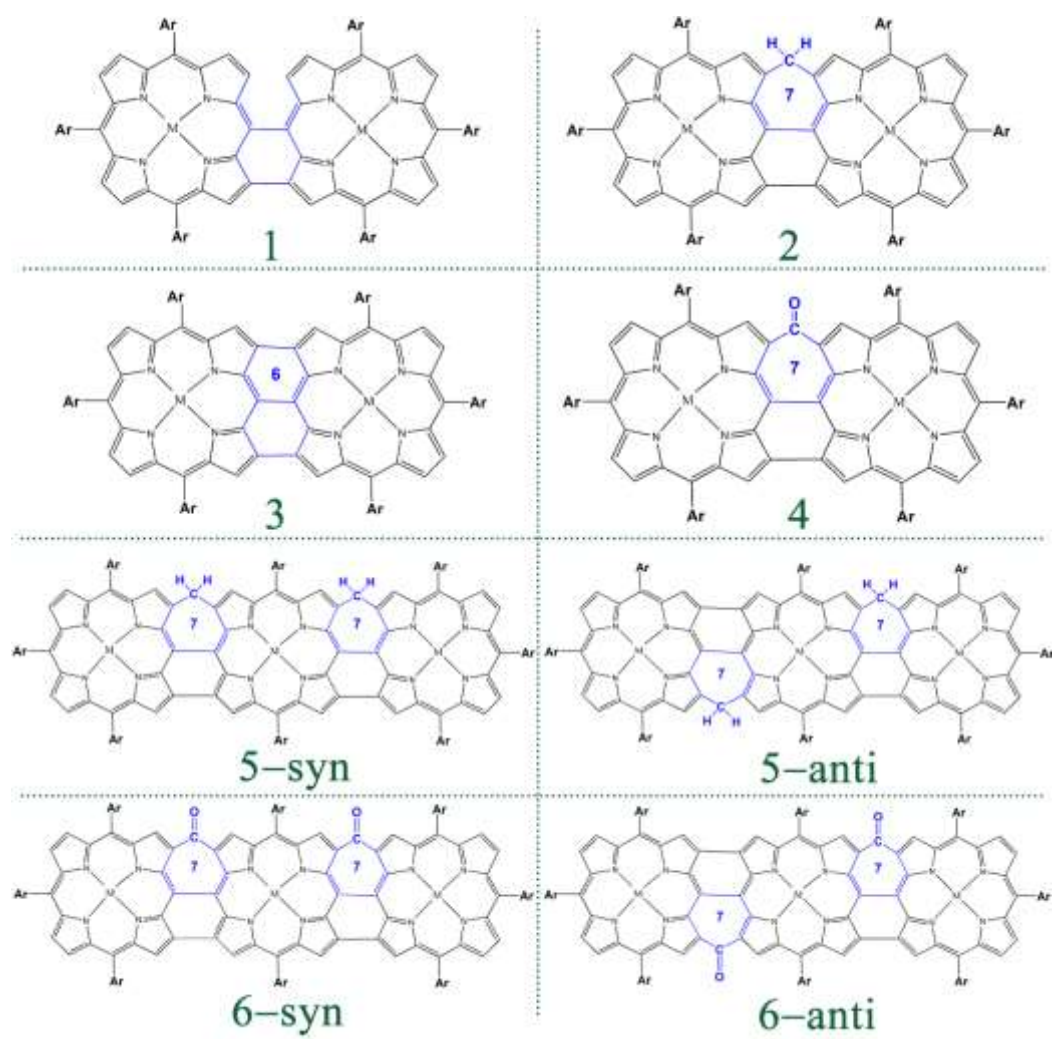

Figure S1. The Geometric structures of the porphyrin derivatives.



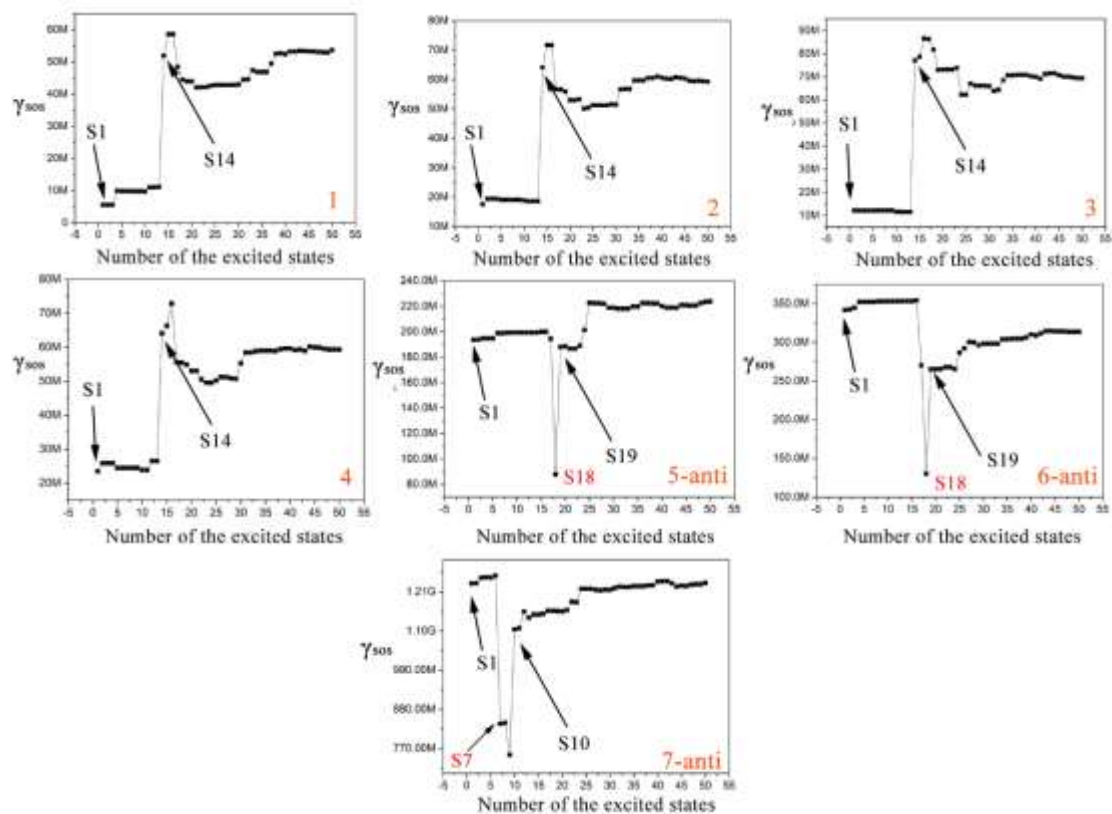

Figure S2. Convergent behavior of  $\gamma_{\text{tot}}$  values of all studied complexes dependent on the first 50 states.

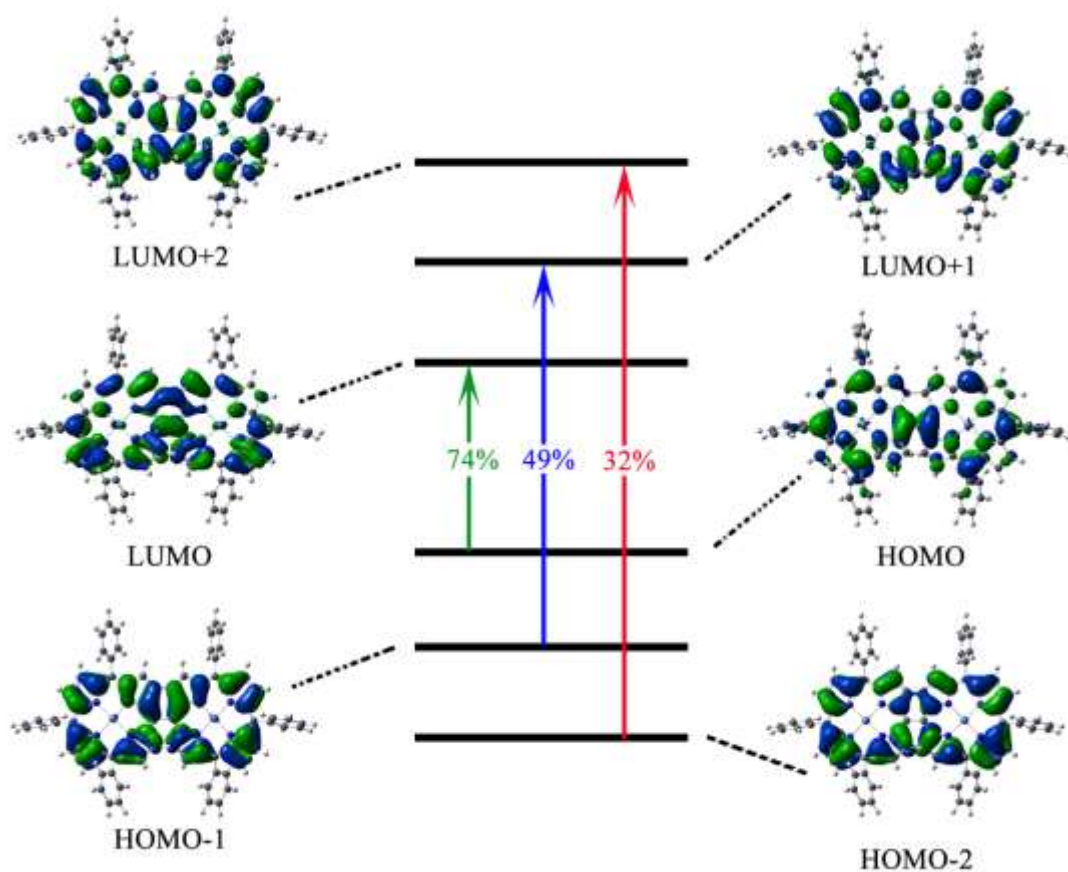

Figure S3. Molecular orbitals involved in the crucial intense electronic transitions in the absorption spectra of complex **1**.

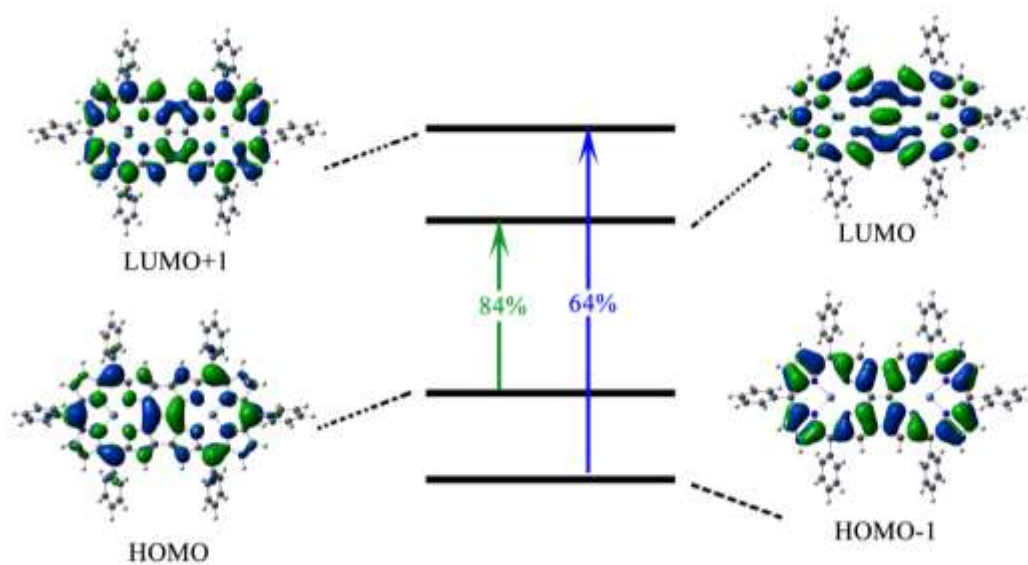

Figure S4. Molecular orbitals involved in the crucial intense electronic transitions in the absorption spectra of complex **3**.

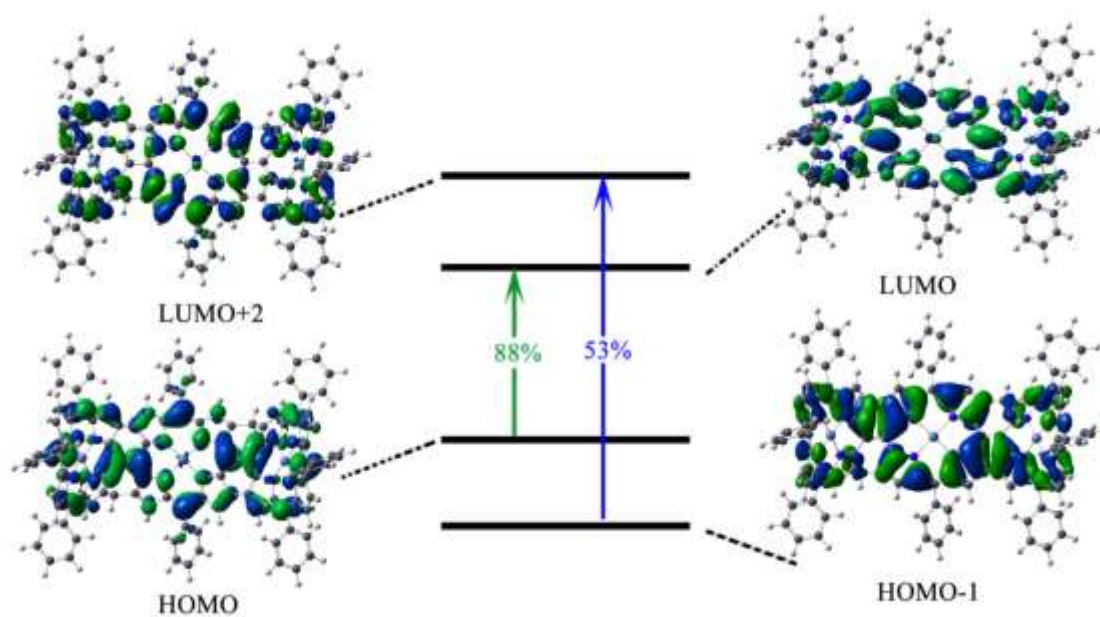

Figure S5. Molecular orbitals involved in the crucial intense electronic transitions in the absorption spectra of complex **5-anti**.

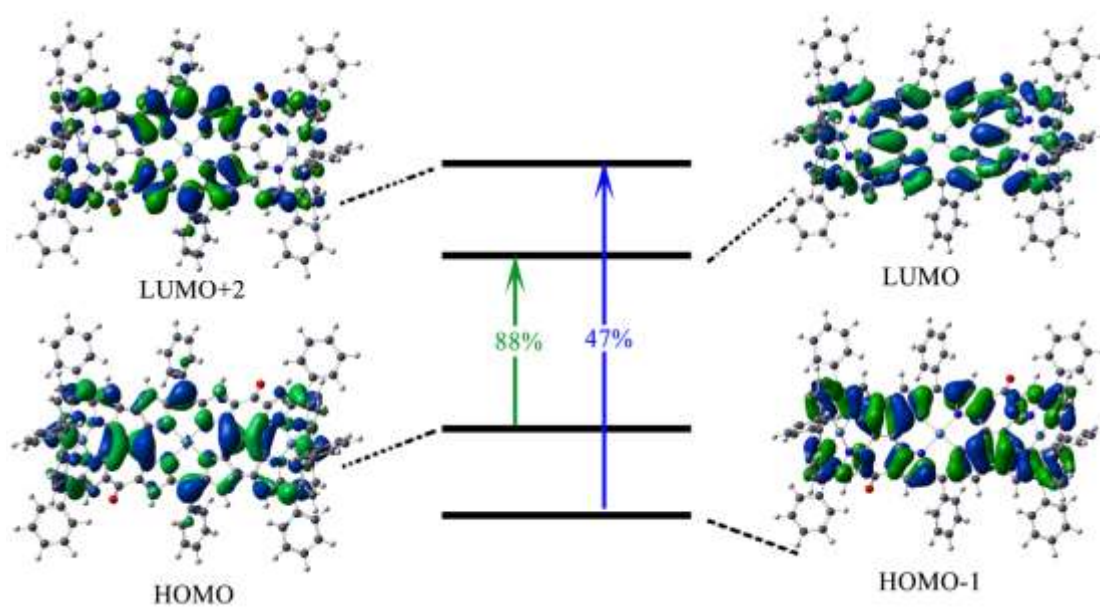

Figure S6. Molecular orbitals involved in the crucial intense electronic transitions in the absorption spectra of complex **6-anti**.

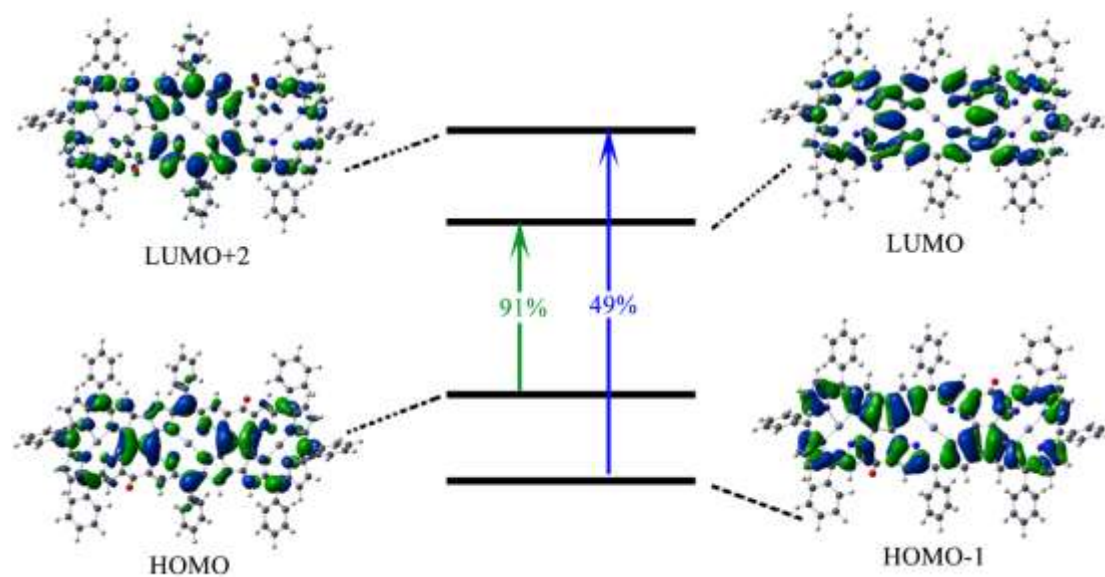

Figure S7. Molecular orbitals involved in the crucial intense electronic transitions in the absorption spectra of complex **7-anti**.

### III Cartesian Coordinates of Optimized Structures

1

symmetry c1

|   |             |             |             |
|---|-------------|-------------|-------------|
| C | -1.41923100 | 1.16160400  | 0.11146600  |
| C | -0.71733800 | 2.41912300  | 0.03558800  |
| C | -1.67371400 | 3.39764100  | 0.14143700  |
| H | -1.53658900 | 4.46904400  | 0.13852700  |
| C | -2.94166600 | 2.73069200  | 0.22988600  |
| C | -4.18000900 | 3.37778400  | 0.16152700  |
| C | -5.36086000 | 2.66873400  | -0.08384500 |
| C | -6.62780100 | 3.27655200  | -0.39790700 |
| H | -6.83073000 | 4.33680800  | -0.36916600 |
| C | -7.47475100 | 2.27036100  | -0.74627700 |
| C | -6.75135800 | 1.03667900  | -0.57902600 |
| C | -7.34058300 | -0.23135000 | -0.68376600 |
| C | -6.72487800 | -1.36744600 | -0.15511200 |
| C | -7.36199100 | -2.65114500 | -0.00153900 |
| C | -6.52712500 | -3.41920700 | 0.74864100  |
| H | -6.67150500 | -4.43860000 | 1.07547800  |
| C | -5.34387700 | -2.63522700 | 0.99631900  |
| C | -4.19608800 | -3.13266100 | 1.63179800  |
| C | -2.96343300 | -2.49097700 | 1.51403900  |
| C | -1.70461700 | -3.03796300 | 1.95237300  |

|   |             |             |             |
|---|-------------|-------------|-------------|
| H | -1.59040000 | -3.91934800 | 2.56579500  |
| C | -0.72699800 | -2.24862900 | 1.43263800  |
| H | 0.34130000  | -2.34576900 | 1.55527900  |
| C | -1.38412600 | -1.17347300 | 0.73072100  |
| C | -0.72556300 | -0.05329900 | 0.18622800  |
| C | -4.21090500 | 4.86905600  | 0.25318300  |
| C | -3.87870500 | 5.50369100  | 1.46101400  |
| H | -3.61457700 | 4.89693900  | 2.32268700  |
| C | -3.89455400 | 6.89542800  | 1.56339600  |
| C | -4.23714000 | 7.67671200  | 0.45795400  |
| H | -4.24861500 | 8.76047000  | 0.53701100  |
| C | -4.54811200 | 5.66572300  | -0.85301500 |
| H | -4.78835200 | 5.18763400  | -1.79839400 |
| C | -4.29475300 | -4.43507900 | 2.35691500  |
| C | -5.10883800 | -4.54286200 | 3.49661400  |
| H | -5.64887300 | -3.66712900 | 3.84565300  |
| C | -5.21922400 | -5.75216500 | 4.18397700  |
| C | -4.52255600 | -6.87801200 | 3.74004100  |
| H | -4.60909400 | -7.82032500 | 4.27433000  |
| C | -3.71666800 | -6.78675800 | 2.60326500  |
| C | -3.60403500 | -5.57653100 | 1.91747000  |
| H | -2.98698000 | -5.51293100 | 1.02582900  |



|   |            |             |             |
|---|------------|-------------|-------------|
| C | 1.41600300 | 1.15261100  | -0.06896100 |
| C | 0.71696000 | 2.41454800  | -0.04663000 |
| C | 1.67611500 | 3.38549000  | -0.18870400 |
| H | 1.53657500 | 4.45421400  | -0.25610200 |
| C | 2.94467300 | 2.71440300  | -0.21882600 |
| C | 4.18838100 | 3.34990700  | -0.16279900 |
| C | 5.36489700 | 2.63090900  | 0.08047700  |
| C | 6.61310100 | 3.23855500  | 0.46280100  |
| H | 6.79649800 | 4.30242300  | 0.49861000  |
| C | 7.46046500 | 2.22762100  | 0.79628000  |
| C | 6.75110200 | 0.99488300  | 0.57132800  |
| C | 7.34058200 | -0.27397600 | 0.65238200  |
| C | 6.72040700 | -1.40172100 | 0.11068900  |
| C | 7.35777000 | -2.68082900 | -0.07427600 |
| C | 6.50680700 | -3.44353100 | -0.81197500 |
| H | 6.64598400 | -4.45887500 | -1.15330200 |
| C | 5.31531200 | -2.66085600 | -1.02074000 |
| C | 4.14952300 | -3.15717000 | -1.62351000 |
| C | 2.92055300 | -2.51660800 | -1.46900100 |
| C | 1.65106100 | -3.06522200 | -1.87311700 |
| H | 1.52154300 | -3.94980800 | -2.47881400 |
| C | 0.68688000 | -2.27150000 | -1.33643000 |

|   |             |             |             |
|---|-------------|-------------|-------------|
| H | -0.38367800 | -2.36765800 | -1.43647900 |
| C | 1.36132600  | -1.19163200 | -0.65713400 |
| C | 0.71564600  | -0.06074100 | -0.11910300 |
| C | 4.26640300  | 4.83955700  | -0.25645500 |
| C | 3.72482400  | 5.66600300  | 0.74133000  |
| H | 3.24307900  | 5.21244800  | 1.60286900  |
| C | 3.81358900  | 7.05527800  | 0.64123600  |
| C | 4.44633900  | 7.64165600  | -0.45685900 |
| H | 4.51472400  | 8.72340800  | -0.53457700 |
| C | 4.99348900  | 6.83005400  | -1.45272000 |
| C | 4.90644600  | 5.44082300  | -1.35205900 |
| H | 5.32992700  | 4.81067100  | -2.12924900 |
| C | 4.22771800  | -4.45820400 | -2.35390800 |
| C | 3.55665900  | -5.60273200 | -1.89272800 |
| H | 2.97010900  | -5.54251300 | -0.98047300 |
| C | 3.65018700  | -6.81162100 | -2.58377700 |
| C | 4.41716200  | -6.89836600 | -3.74750400 |
| H | 4.48887900  | -7.83964100 | -4.28580200 |
| C | 5.09407000  | -5.76932800 | -4.21335900 |
| C | 5.00268900  | -4.56132300 | -3.52089800 |
| H | 5.52723000  | -3.68308500 | -3.88688200 |
| N | -2.76626600 | 1.35801400  | 0.23623800  |

|    |             |             |             |
|----|-------------|-------------|-------------|
| N  | -5.46232100 | 1.29282400  | -0.17081000 |
| N  | -5.47055000 | -1.39087200 | 0.42518100  |
| N  | -2.74818700 | -1.31073900 | 0.82039900  |
| N  | 2.76409400  | 1.34063600  | -0.18624300 |
| N  | 5.46936800  | 1.25622800  | 0.14109900  |
| N  | 5.45379100  | -1.42154000 | -0.44207700 |
| N  | 2.72291200  | -1.33269700 | -0.77604200 |
| Ni | -4.11466900 | -0.01356100 | 0.31577900  |
| Ni | 4.10474100  | -0.04042600 | -0.30409800 |
| C  | -4.56164400 | 7.05755000  | -0.75097100 |
| H  | 3.39294000  | 7.67898100  | 1.42565000  |
| H  | 5.48712700  | 7.27752300  | -2.31135700 |
| H  | -3.64117000 | 7.36840600  | 2.50853400  |
| H  | -4.81986500 | 7.65801200  | -1.61930200 |
| H  | 5.69255600  | -5.82685700 | -5.11872900 |
| H  | 3.12805000  | -7.68772500 | -2.20814500 |
| H  | -3.17884600 | -7.66041000 | 2.24443500  |
| H  | -5.84803800 | -5.81320500 | 5.06831700  |
| C  | 8.71036600  | -0.38649500 | 1.23988900  |
| C  | 8.90743000  | -0.14599900 | 2.60933300  |
| C  | 9.82435200  | -0.71226500 | 0.44924800  |
| C  | 10.17994900 | -0.23976500 | 3.17455700  |

|   |              |             |             |
|---|--------------|-------------|-------------|
| H | 8.05311300   | 0.10862400  | 3.23044400  |
| C | 11.09727300  | -0.80419200 | 1.01423900  |
| H | 9.68863900   | -0.88197800 | -0.61512600 |
| C | 11.27883400  | -0.57031000 | 2.37891900  |
| H | 10.31143900  | -0.05642900 | 4.23770100  |
| H | 11.94825500  | -1.05262000 | 0.38543300  |
| H | 12.27002900  | -0.64243900 | 2.81850400  |
| C | -8.70707400  | -0.33159800 | -1.28012300 |
| C | -8.89990500  | -0.04239800 | -2.64091100 |
| C | -9.82301100  | -0.69171200 | -0.50698900 |
| C | -10.16913500 | -0.12348200 | -3.21522900 |
| H | -8.04434900  | 0.23936500  | -3.24840500 |
| C | -11.09279800 | -0.77019700 | -1.08083700 |
| H | -9.69147800  | -0.89777900 | 0.55141600  |
| C | -11.26960700 | -0.48878800 | -2.43717000 |
| H | -10.29691100 | 0.09706900  | -4.27173900 |
| H | -11.94521300 | -1.04520900 | -0.46518300 |
| H | -12.25838600 | -0.55079300 | -2.88368700 |
| H | 8.48331800   | 2.29835600  | 1.13615700  |
| H | -8.50991800  | 2.34325600  | -1.04609600 |
| H | 8.33696300   | -2.94506500 | 0.29663100  |
| H | -8.33066900  | -2.91450100 | -0.39959600 |

2

symmetry c1

|   |            |             |             |
|---|------------|-------------|-------------|
| C | 1.74034753 | 1.24448384  | -5.69082165 |
| C | 1.41011853 | 2.44151384  | -6.42567265 |
| C | 2.48705953 | 3.26945684  | -6.34309165 |
| H | 2.59894153 | 4.24532884  | -6.79329865 |
| C | 3.46647653 | 2.61044284  | -5.52776065 |
| C | 4.59486753 | 3.22986984  | -4.99167465 |
| C | 5.44688053 | 2.56149784  | -4.09937865 |
| C | 6.39647953 | 3.21221084  | -3.23549965 |
| H | 6.56323753 | 4.27864084  | -3.19203565 |
| C | 6.98159753 | 2.23798384  | -2.48600865 |
| H | 7.72961353 | 2.35048284  | -1.71527065 |
| C | 6.43806753 | 0.98209484  | -2.93636265 |
| C | 6.94229053 | -0.27643216 | -2.59826365 |
| C | 6.49532753 | -1.43631916 | -3.24607165 |
| C | 7.21524453 | -2.68321416 | -3.25094965 |
| H | 8.13701153 | -2.86576716 | -2.71813465 |
| C | 6.54381853 | -3.52598616 | -4.08220065 |
| H | 6.80285853 | -4.53860016 | -4.35345665 |
| C | 5.37027053 | -2.82219416 | -4.53146765 |
| C | 4.29974153 | -3.40865416 | -5.21521965 |

|   |             |             |             |
|---|-------------|-------------|-------------|
| C | 3.09887553  | -2.71616616 | -5.41311665 |
| C | 1.84373353  | -3.35879816 | -5.66942165 |
| H | 1.70752253  | -4.42021316 | -5.81602565 |
| C | 0.88362453  | -2.38361916 | -5.58900565 |
| C | 1.57304953  | -1.13545416 | -5.38969165 |
| C | 0.91353253  | 0.09918184  | -5.54888565 |
| C | 4.87100053  | 4.66584884  | -5.29191565 |
| C | 3.95625253  | 5.67612084  | -4.95005865 |
| H | 3.02905453  | 5.40564584  | -4.45338065 |
| C | 4.23641953  | 7.01526484  | -5.22470265 |
| C | 5.43529853  | 7.36936984  | -5.84714765 |
| H | 5.65253453  | 8.41231084  | -6.06172165 |
| C | 6.35489053  | 6.37549284  | -6.18889965 |
| C | 6.07708053  | 5.03695384  | -5.91008365 |
| H | 6.79258353  | 4.26530784  | -6.18005865 |
| C | 8.05210953  | -0.39834616 | -1.60714965 |
| C | 9.30863453  | 0.18831284  | -1.83211665 |
| H | 9.48031153  | 0.73870884  | -2.75261465 |
| C | 10.33576053 | 0.05508784  | -0.89692065 |
| C | 10.12590053 | -0.66710916 | 0.27977535  |
| H | 10.92577953 | -0.76914816 | 1.00826235  |
| C | 8.88365453  | -1.26094116 | 0.51240035  |

|   |             |             |             |
|---|-------------|-------------|-------------|
| C | 7.85766553  | -1.13091416 | -0.42426865 |
| H | 6.89068853  | -1.59056816 | -0.24011665 |
| C | 4.37200253  | -4.83705816 | -5.64249465 |
| C | 4.26079853  | -5.16585216 | -7.00388965 |
| H | 4.13741453  | -4.36901616 | -7.73189165 |
| C | 4.31856753  | -6.49502116 | -7.42435165 |
| C | 4.47988053  | -7.52038316 | -6.49031865 |
| H | 4.52322253  | -8.55581916 | -6.81734165 |
| C | 4.58010753  | -7.20799416 | -5.13283165 |
| C | 4.52635953  | -5.87859216 | -4.71234165 |
| H | 4.58834853  | -5.64060516 | -3.65448865 |
| C | -1.40244847 | 1.24444184  | -5.69087665 |
| C | -1.07226647 | 2.44146984  | -6.42576365 |
| C | -2.14930247 | 3.26930084  | -6.34335765 |
| H | -2.26124547 | 4.24511184  | -6.79367965 |
| C | -3.12873147 | 2.61025484  | -5.52806065 |
| C | -4.25723547 | 3.22959184  | -4.99211465 |
| C | -5.10915947 | 2.56126584  | -4.09968765 |
| C | -6.05881447 | 3.21201984  | -3.23589365 |
| H | -6.22576447 | 4.27842884  | -3.19266565 |
| C | -6.64366147 | 2.23787584  | -2.48608865 |
| H | -7.39159447 | 2.35043784  | -1.71528065 |

|   |             |             |             |
|---|-------------|-------------|-------------|
| C | -6.09998847 | 0.98196484  | -2.93621565 |
| C | -6.60398047 | -0.27658616 | -2.59781065 |
| C | -6.15700547 | -1.43650016 | -3.24558065 |
| C | -6.87686947 | -2.68342816 | -3.25032765 |
| H | -7.79852047 | -2.86602716 | -2.71732865 |
| C | -6.20559747 | -3.52615416 | -4.08175365 |
| H | -6.46468647 | -4.53875616 | -4.35300365 |
| C | -5.03214947 | -2.82232516 | -4.53122265 |
| C | -3.96171047 | -3.40874316 | -5.21515465 |
| C | -2.76087447 | -2.71622016 | -5.41315665 |
| C | -1.50571847 | -3.35883116 | -5.66947265 |
| H | -1.36948947 | -4.42024616 | -5.81606365 |
| C | -0.54562747 | -2.38363616 | -5.58902565 |
| C | -1.23507547 | -1.13548316 | -5.38972565 |
| C | -0.57558847 | 0.09916684  | -5.54890765 |
| C | -4.53362747 | 4.66545984  | -5.29262765 |
| C | -5.73973647 | 5.03620184  | -5.91094865 |
| H | -6.45505647 | 4.26436184  | -6.18085665 |
| C | -6.01782147 | 6.37463384  | -6.19002665 |
| C | -5.09847347 | 7.36876784  | -5.84839065 |
| H | -5.31591247 | 8.41162584  | -6.06316965 |
| C | -3.89956647 | 7.01502984  | -5.22577865 |



|   |              |             |             |
|---|--------------|-------------|-------------|
| C | -3.61913347  | 5.67600484  | -4.95086465 |
| H | -2.69193047  | 5.40582784  | -4.45403965 |
| C | -7.71357147  | -0.39853516 | -1.60645265 |
| C | -8.97023747  | 0.18790784  | -1.83119465 |
| H | -9.14222047  | 0.73816184  | -2.75171865 |
| C | -9.99713347  | 0.05462884  | -0.89575065 |
| C | -9.78690147  | -0.66741016 | 0.28097335  |
| H | -10.58659747 | -0.76949416 | 1.00965535  |
| C | -8.54451547  | -1.26104116 | 0.51337335  |
| C | -7.51876047  | -1.13096316 | -0.42354065 |
| H | -6.55167447  | -1.59045516 | -0.23956065 |
| C | -4.03398347  | -4.83711416 | -5.64250665 |
| C | -3.92281947  | -5.16581016 | -7.00393165 |
| H | -3.79947247  | -4.36891816 | -7.73187965 |
| C | -3.98058547  | -6.49494716 | -7.42449465 |
| C | -4.14185047  | -7.52038316 | -6.49053465 |
| H | -4.18519047  | -8.55579416 | -6.81763465 |
| C | -4.24202447  | -7.20809616 | -5.13302065 |
| C | -4.18828047  | -5.87872616 | -4.71242965 |
| H | -4.25020647  | -5.64082916 | -3.65455365 |
| C | 0.16895253   | 2.64483584  | -7.22918665 |
| H | 0.16898753   | 1.94260184  | -8.07899065 |

|    |              |             |             |
|----|--------------|-------------|-------------|
| H  | 0.16895653   | 3.65093984  | -7.66186865 |
| N  | 3.02857153   | 1.33434084  | -5.20938265 |
| N  | 5.45754453   | 1.20540184  | -3.88459165 |
| N  | 5.38089053   | -1.52807616 | -4.04849965 |
| N  | 2.91901253   | -1.35723016 | -5.23380165 |
| N  | -2.69070447  | 1.33422384  | -5.20953265 |
| N  | -5.11958147  | 1.20521684  | -3.88456165 |
| N  | -5.04271647  | -1.52821716 | -4.04820965 |
| N  | -2.58103747  | -1.35728516 | -5.23387065 |
| Ni | 4.19610853   | -0.08779316 | -4.58245565 |
| Ni | -3.85811847  | -0.08791616 | -4.58242865 |
| H  | 4.69304553   | -8.00046716 | -4.39764965 |
| H  | 4.23893853   | -6.72854816 | -8.48278665 |
| H  | -3.90099047  | -6.72839016 | -8.48295165 |
| H  | -4.35491347  | -8.00062416 | -4.39789165 |
| H  | -8.37120547  | -1.82476616 | 1.42625235  |
| H  | -10.96446247 | 0.51029584  | -1.09055065 |
| H  | -3.18285447  | 7.78286784  | -4.94637765 |
| H  | -6.95268147  | 6.63995084  | -6.67669365 |
| H  | 3.51951653   | 7.78289384  | -4.94521765 |
| H  | 7.28972553   | 6.64110784  | -6.67545265 |
| H  | 11.30297753  | 0.51092284  | -1.09188365 |

|   |            |             |            |
|---|------------|-------------|------------|
| H | 8.71063053 | -1.82478416 | 1.42526035 |
|---|------------|-------------|------------|

### 3

symmetry c2

|   |            |             |             |
|---|------------|-------------|-------------|
| C | 1.42236100 | 1.21409400  | -0.12070300 |
| C | 0.71410300 | 2.45749500  | -0.29068800 |
| C | 1.67450000 | 3.42128800  | -0.44050100 |
| H | 1.53988200 | 4.47889300  | -0.61207700 |
| C | 2.94738400 | 2.76467500  | -0.30590200 |
| C | 4.17185000 | 3.42889700  | -0.28656400 |
| C | 5.36776000 | 2.76391800  | 0.00572400  |
| C | 6.59787000 | 3.45306600  | 0.29446900  |
| H | 6.72898900 | 4.52415500  | 0.25212700  |
| C | 7.50206800 | 2.50936900  | 0.66488600  |
| H | 8.52582500 | 2.65181300  | 0.97703200  |
| C | 6.84311800 | 1.23460400  | 0.55576400  |
| C | 7.48421000 | 0.01063300  | 0.75186800  |
| C | 6.85378000 | -1.20827400 | 0.49434400  |
| C | 7.54622100 | -2.46976400 | 0.47412900  |
| H | 8.59180500 | -2.60355900 | 0.70870700  |
| C | 6.64374500 | -3.40843100 | 0.08704700  |
| H | 6.79605900 | -4.46983700 | -0.04112900 |

|   |             |             |             |
|---|-------------|-------------|-------------|
| C | 5.38870800  | -2.72961400 | -0.10150900 |
| C | 4.19175900  | -3.39702400 | -0.38064400 |
| C | 2.96134000  | -2.74430500 | -0.34905300 |
| C | 1.69142800  | -3.40898900 | -0.46856400 |
| H | 1.56216100  | -4.46580300 | -0.64923100 |
| C | 0.72651200  | -2.45300800 | -0.29826100 |
| C | 1.42865100  | -1.20633900 | -0.12727300 |
| C | 0.73577300  | 0.00194500  | -0.06593200 |
| C | 4.21172100  | 4.90713300  | -0.51137500 |
| C | 3.66260300  | 5.80019200  | 0.42258800  |
| H | 3.20460500  | 5.40790000  | 1.32628200  |
| C | 3.71157000  | 7.17802000  | 0.20479600  |
| C | 4.31053200  | 7.68567400  | -0.95002300 |
| H | 4.34800000  | 8.75839700  | -1.11964200 |
| C | 4.86310800  | 6.80733400  | -1.88443600 |
| C | 4.81609500  | 5.42971600  | -1.66571000 |
| H | 5.24396300  | 4.74745600  | -2.39505100 |
| C | 8.91529000  | -0.00441400 | 1.18932000  |
| C | 9.25749500  | -0.46420300 | 2.47072600  |
| H | 8.47086700  | -0.79885400 | 3.14136300  |
| C | 10.58936500 | -0.48730900 | 2.88761800  |
| C | 11.60142400 | -0.05477600 | 2.02827100  |

|   |             |             |             |
|---|-------------|-------------|-------------|
| H | 12.63851800 | -0.07357100 | 2.35229900  |
| C | 11.27369900 | 0.40030300  | 0.74933700  |
| C | 9.94162100  | 0.42524000  | 0.33320900  |
| H | 9.68965200  | 0.77232800  | -0.66502200 |
| C | 4.23639800  | -4.86756400 | -0.65312400 |
| C | 4.78065500  | -5.34792800 | -1.85450200 |
| H | 5.16027000  | -4.63924000 | -2.58539200 |
| C | 4.83012300  | -6.71793100 | -2.11678400 |
| C | 4.33895100  | -7.63008900 | -1.18047700 |
| H | 4.37797400  | -8.69677700 | -1.38434600 |
| C | 3.79902700  | -7.16412400 | 0.02009300  |
| C | 3.74853600  | -5.79398200 | 0.28201500  |
| H | 3.33598800  | -5.43382500 | 1.22038900  |
| C | -1.42865100 | 1.20633800  | -0.12727500 |
| C | -0.72651200 | 2.45300600  | -0.29827000 |
| C | -1.69142800 | 3.40898600  | -0.46857500 |
| H | -1.56216200 | 4.46579900  | -0.64925000 |
| C | -2.96134000 | 2.74430400  | -0.34905500 |
| C | -4.19176000 | 3.39702200  | -0.38064600 |
| C | -5.38870800 | 2.72961400  | -0.10150700 |
| C | -6.64374400 | 3.40843100  | 0.08704900  |
| H | -6.79605900 | 4.46983600  | -0.04112900 |

|   |             |             |             |
|---|-------------|-------------|-------------|
| C | -7.54621900 | 2.46976500  | 0.47413600  |
| H | -8.59180300 | 2.60356100  | 0.70871600  |
| C | -6.85377800 | 1.20827500  | 0.49435500  |
| C | -7.48420800 | -0.01063100 | 0.75188400  |
| C | -6.84311600 | -1.23460300 | 0.55578100  |
| C | -7.50206600 | -2.50936800 | 0.66490800  |
| H | -8.52582200 | -2.65181100 | 0.97705900  |
| C | -6.59786900 | -3.45306500 | 0.29449000  |
| H | -6.72898800 | -4.52415400 | 0.25215000  |
| C | -5.36776000 | -2.76391800 | 0.00573800  |
| C | -4.17185100 | -3.42889700 | -0.28654900 |
| C | -2.94738400 | -2.76467600 | -0.30588800 |
| C | -1.67450000 | -3.42129000 | -0.44048800 |
| H | -1.53988200 | -4.47889500 | -0.61206100 |
| C | -0.71410300 | -2.45749700 | -0.29067700 |
| C | -1.42236100 | -1.21409500 | -0.12069500 |
| C | -0.73577300 | -0.00194600 | -0.06593100 |
| C | -4.23639900 | 4.86756200  | -0.65313100 |
| C | -4.78065900 | 5.34792200  | -1.85450900 |
| H | -5.16027600 | 4.63923100  | -2.58539600 |
| C | -4.83012800 | 6.71792300  | -2.11679600 |
| C | -4.33895400 | 7.63008400  | -1.18049300 |

|   |              |             |             |
|---|--------------|-------------|-------------|
| H | -4.37797900  | 8.69677200  | -1.38436600 |
| C | -3.79902700  | 7.16412500  | 0.02007700  |
| C | -3.74853600  | 5.79398300  | 0.28200400  |
| H | -3.33598600  | 5.43382900  | 1.22037900  |
| C | -8.91528500  | 0.00441700  | 1.18934300  |
| C | -9.94162000  | -0.42524500 | 0.33324100  |
| H | -9.68965600  | -0.77234200 | -0.66498900 |
| C | -11.27369700 | -0.40030700 | 0.74937400  |
| C | -11.60141600 | 0.05478400  | 2.02830700  |
| H | -12.63850900 | 0.07358000  | 2.35233900  |
| C | -10.58935300 | 0.48732500  | 2.88764400  |
| C | -9.25748600  | 0.46421700  | 2.47074600  |
| H | -8.47085500  | 0.79887500  | 3.14137600  |
| C | -4.21172400  | -4.90713400 | -0.51135800 |
| C | -4.81610300  | -5.42971700 | -1.66569100 |
| H | -5.24397200  | -4.74745700 | -2.39503100 |
| C | -4.86311800  | -6.80733500 | -1.88441500 |
| C | -4.31054000  | -7.68567600 | -0.95000400 |
| H | -4.34800900  | -8.75839800 | -1.11962200 |
| C | -3.71157200  | -7.17802100 | 0.20481200  |
| C | -3.66260400  | -5.80019300 | 0.42260300  |
| H | -3.20460200  | -5.40790000 | 1.32629600  |

|    |              |             |             |
|----|--------------|-------------|-------------|
| N  | 2.77889500   | 1.39982500  | -0.12671500 |
| N  | 5.52584500   | 1.40287700  | 0.17126500  |
| N  | 5.52951700   | -1.37748300 | 0.14083800  |
| N  | 2.78614100   | -1.38321500 | -0.14983100 |
| N  | -2.78614100  | 1.38321400  | -0.14982900 |
| N  | -5.52951600  | 1.37748300  | 0.14084500  |
| N  | -5.52584500  | -1.40287600 | 0.17127700  |
| N  | -2.77889400  | -1.39982600 | -0.12670600 |
| Ni | 4.15707200   | 0.01058200  | 0.00802100  |
| Ni | -4.15707100  | -0.01058200 | 0.00802900  |
| H  | 3.28582100   | 7.85461200  | 0.94114600  |
| H  | 5.32959600   | 7.19344800  | -2.78691600 |
| H  | 12.05562800  | 0.73242600  | 0.07144700  |
| H  | 10.83501000  | -0.84142100 | 3.88533400  |
| H  | 5.25018300   | -7.07155900 | -3.05468300 |
| H  | 3.42059600   | -7.86727700 | 0.75740800  |
| H  | -5.32961000  | -7.19345000 | -2.78689400 |
| H  | -3.28582200  | -7.85461200 | 0.94116200  |
| H  | -10.83499400 | 0.84144600  | 3.88535800  |
| H  | -12.05562800 | -0.73243700 | 0.07149100  |
| H  | -3.42059600  | 7.86728000  | 0.75738900  |
| H  | -5.25019100  | 7.07154800  | -3.05469500 |



4

symmetry c1

|   |            |             |             |
|---|------------|-------------|-------------|
| C | 1.59137723 | 1.59321038  | -4.95972910 |
| C | 1.25991523 | 2.86002038  | -5.56958810 |
| C | 2.40048423 | 3.61846338  | -5.57905810 |
| H | 2.48947823 | 4.61231938  | -5.98868710 |
| C | 3.40137323 | 2.87817238  | -4.89316110 |
| C | 4.59488523 | 3.43422838  | -4.41804110 |
| C | 5.44937623 | 2.72161838  | -3.56786810 |
| C | 6.45358123 | 3.31622138  | -2.72495810 |
| H | 6.68151523 | 4.37138538  | -2.68516910 |
| C | 6.99203423 | 2.30954038  | -1.98308610 |
| H | 7.75703423 | 2.37871638  | -1.22402410 |
| C | 6.37068623 | 1.08616938  | -2.42471410 |
| C | 6.80573423 | -0.20318362 | -2.09387610 |
| C | 6.32252523 | -1.32349262 | -2.78088710 |
| C | 6.96780823 | -2.61286362 | -2.78928910 |
| H | 7.83662023 | -2.87168562 | -2.20184210 |
| C | 6.30264423 | -3.38362762 | -3.69198810 |
| H | 6.50190423 | -4.40752462 | -3.97341910 |
| C | 5.20976023 | -2.58922362 | -4.19315310 |
| C | 4.15793923 | -3.09526562 | -4.96437610 |

|   |             |             |             |
|---|-------------|-------------|-------------|
| C | 2.96750323  | -2.38027362 | -5.12547210 |
| C | 1.71991223  | -2.97304462 | -5.50769010 |
| H | 1.58540323  | -3.99743262 | -5.82165810 |
| C | 0.75986623  | -2.02001562 | -5.29503410 |
| C | 1.43953623  | -0.80778962 | -4.91593710 |
| C | 0.76690023  | 0.43356338  | -4.90642210 |
| C | 4.93523023  | 4.85422738  | -4.72793810 |
| C | 4.11275523  | 5.91756638  | -4.31986310 |
| H | 3.20559223  | 5.70521838  | -3.76190510 |
| C | 4.45973323  | 7.23775338  | -4.60874910 |
| C | 5.63368123  | 7.51862138  | -5.31063810 |
| H | 5.90116823  | 8.54694238  | -5.53821310 |
| C | 6.46308023  | 6.47103038  | -5.71631910 |
| C | 6.11968923  | 5.15109938  | -5.42297210 |
| H | 6.76377123  | 4.33715438  | -5.74377610 |
| C | 7.88428923  | -0.39695162 | -1.07999310 |
| C | 7.61794423  | -1.12491062 | 0.09147390  |
| H | 6.62089523  | -1.52625462 | 0.24993490  |
| C | 8.61264123  | -1.32446462 | 1.04949890  |
| C | 9.89349523  | -0.80544562 | 0.85013190  |
| H | 10.66868523 | -0.96155462 | 1.59547490  |
| C | 10.17388723 | -0.08821762 | -0.31483210 |

|   |             |             |             |
|---|-------------|-------------|-------------|
| C | 9.17870323  | 0.11399238  | -1.27195510 |
| H | 9.40542623  | 0.65856738  | -2.18400310 |
| C | 4.27016823  | -4.48645462 | -5.50498110 |
| C | 5.06451523  | -4.73282262 | -6.63506010 |
| H | 5.57963923  | -3.90376562 | -7.11248810 |
| C | 5.19063623  | -6.02470862 | -7.14869710 |
| C | 4.52738023  | -7.09053762 | -6.53759810 |
| H | 4.62573523  | -8.09634662 | -6.93700510 |
| C | 3.73915223  | -6.85789362 | -5.40860410 |
| C | 3.61253323  | -5.56601062 | -4.89494710 |
| H | 3.00784923  | -5.38882462 | -4.00971510 |
| C | -1.57239177 | 1.55912538  | -4.98225810 |
| C | -1.26064177 | 2.82393838  | -5.60764010 |
| C | -2.42319877 | 3.54593138  | -5.66676910 |
| H | -2.52955477 | 4.52837638  | -6.09902510 |
| C | -3.42095077 | 2.79069338  | -4.99363010 |
| C | -4.65083477 | 3.31893138  | -4.58265110 |
| C | -5.49961177 | 2.61729238  | -3.71939210 |
| C | -6.58209677 | 3.20185138  | -2.97072410 |
| H | -6.89067377 | 4.23505938  | -3.03452710 |
| C | -7.08875677 | 2.21827238  | -2.17773310 |
| H | -7.91146977 | 2.27964238  | -1.48038010 |

|   |             |             |             |
|---|-------------|-------------|-------------|
| C | -6.35314577 | 1.01622538  | -2.48070810 |
| C | -6.73251377 | -0.26602562 | -2.06230310 |
| C | -6.21035477 | -1.40798562 | -2.67785610 |
| C | -6.74996577 | -2.73831862 | -2.54652010 |
| H | -7.55238777 | -3.01859462 | -1.88033410 |
| C | -6.07621377 | -3.52807362 | -3.42588210 |
| H | -6.20768077 | -4.58409462 | -3.61188710 |
| C | -5.06499977 | -2.70332562 | -4.03781310 |
| C | -4.01665477 | -3.20449762 | -4.81944810 |
| C | -2.85863177 | -2.45521662 | -5.04723110 |
| C | -1.60499377 | -3.01853962 | -5.45486110 |
| H | -1.44831577 | -4.04298362 | -5.75760710 |
| C | -0.66650677 | -2.03738962 | -5.27829510 |
| C | -1.36921477 | -0.83819062 | -4.89873810 |
| C | -0.72390677 | 0.41833938  | -4.90605310 |
| C | -5.03829677 | 4.70600038  | -4.97850510 |
| C | -6.19074577 | 4.91345138  | -5.75446010 |
| H | -6.77618477 | 4.05578038  | -6.07384510 |
| C | -6.57752977 | 6.20135738  | -6.12636710 |
| C | -5.82410577 | 7.30496638  | -5.72101810 |
| H | -6.12533277 | 8.30816438  | -6.01020710 |
| C | -4.68266577 | 7.11266838  | -4.94020110 |

|   |              |             |             |
|---|--------------|-------------|-------------|
| C | -4.29266877  | 5.82464238  | -4.57170910 |
| H | -3.41117177  | 5.68089538  | -3.95379410 |
| C | -7.80232477  | -0.39374162 | -1.02709210 |
| C | -9.08187877  | -0.87632862 | -1.34621510 |
| H | -9.30294677  | -1.15983462 | -2.37137610 |
| C | -10.06964377 | -0.97770362 | -0.36542410 |
| C | -9.79586277  | -0.59651062 | 0.94978190  |
| H | -10.56535477 | -0.67591062 | 1.71293190  |
| C | -8.52923877  | -0.10885262 | 1.27770190  |
| C | -7.54170077  | -0.00576462 | 0.29698390  |
| H | -6.55567277  | 0.37110638  | 0.55437490  |
| C | -4.09365777  | -4.62334862 | -5.28780310 |
| C | -4.96631777  | -4.96596662 | -6.33210110 |
| H | -5.56505977  | -4.18890762 | -6.79930210 |
| C | -5.06285177  | -6.28589162 | -6.77583510 |
| C | -4.29253777  | -7.28530762 | -6.17815110 |
| H | -4.36828277  | -8.31307662 | -6.52281510 |
| C | -3.42695877  | -6.95769862 | -5.13244310 |
| C | -3.32901077  | -5.63757862 | -4.68967410 |
| H | -2.66467677  | -5.38737062 | -3.86721210 |
| C | -0.00031777  | 3.38146838  | -6.10354810 |
| N | 2.92148423   | 1.60851338  | -4.59430510 |

|    |              |             |             |
|----|--------------|-------------|-------------|
| N  | 5.39177523   | 1.36592238  | -3.35506010 |
| N  | 5.25103123   | -1.32681862 | -3.64579010 |
| N  | 2.78260123   | -1.05337262 | -4.77895310 |
| N  | -2.91049377  | 1.54597338  | -4.64639810 |
| N  | -5.36458877  | 1.28752138  | -3.39924710 |
| N  | -5.16695477  | -1.41050762 | -3.58087410 |
| N  | -2.70235277  | -1.11604362 | -4.73258410 |
| O  | -0.00265977  | 4.36181438  | -6.85024310 |
| Ni | 4.08521023   | 0.14684038  | -4.08241410 |
| Ni | -4.03404377  | 0.07481038  | -4.07815310 |
| H  | 3.81284823   | 8.04705338  | -4.28101210 |
| H  | 7.37767523   | 6.67987638  | -6.26489410 |
| H  | 11.17112023  | 0.30947038  | -0.48381710 |
| H  | 8.38502823   | -1.88399462 | 1.95293990  |
| H  | 5.80646223   | -6.19677662 | -8.02743910 |
| H  | 3.22568323   | -7.68323362 | -4.92232710 |
| H  | -5.73951777  | -6.53186062 | -7.58988610 |
| H  | -2.83083777  | -7.73103162 | -4.65509110 |
| H  | -8.30712077  | 0.19059038  | 2.29852190  |
| H  | -11.05587777 | -1.34868862 | -0.63172610 |
| H  | -4.09487777  | 7.96611238  | -4.61311310 |
| H  | -7.46651377  | 6.34128738  | -6.73559310 |

## 5-anti

symmetry c2

|   |             |             |             |
|---|-------------|-------------|-------------|
| C | -5.39905787 | -1.16450320 | -8.11106361 |
| C | -5.48477887 | -2.31371720 | -8.98211861 |
| C | -6.45884987 | -3.12011420 | -8.47997561 |
| H | -6.80714787 | -4.05755220 | -8.88899861 |
| C | -6.94663887 | -2.50245420 | -7.28093761 |
| C | -7.76241587 | -3.13576320 | -6.34498861 |
| C | -8.09476787 | -2.52748020 | -5.12463561 |
| C | -8.60807187 | -3.22862220 | -3.97760461 |
| H | -8.81240287 | -4.28872420 | -3.94081561 |
| C | -8.73076187 | -2.31302420 | -2.97743461 |
| H | -9.06582087 | -2.47565720 | -1.96377961 |
| C | -8.35520687 | -1.03742620 | -3.53076661 |
| C | -8.55535287 | 0.19635980  | -2.90554461 |
| C | -8.37104287 | 1.39988480  | -3.59883661 |
| C | -8.88129287 | 2.67324980  | -3.15950261 |
| H | -9.40061787 | 2.84163780  | -2.22738561 |
| C | -8.61075287 | 3.57076580  | -4.14595561 |
| H | -8.84241087 | 4.62562280  | -4.17284161 |
| C | -7.88547287 | 2.86090180  | -5.16738661 |
| C | -7.22132787 | 3.48269780  | -6.22932461 |

|   |              |             |             |
|---|--------------|-------------|-------------|
| C | -6.28433787  | 2.79545680  | -7.00554361 |
| C | -5.28666987  | 3.43019880  | -7.81470761 |
| H | -5.20633687  | 4.49351180  | -7.98513061 |
| C | -4.43708687  | 2.43916080  | -8.23370861 |
| C | -4.99997387  | 1.19033480  | -7.78263561 |
| C | -4.54547787  | -0.04364020 | -8.29327361 |
| C | -9.07382187  | 0.25140480  | -1.50620661 |
| C | -10.34184987 | -0.25179620 | -1.17132161 |
| H | -10.96292687 | -0.68643120 | -1.94925761 |
| C | -10.81300787 | -0.18205120 | 0.14040739  |
| C | -10.02532487 | 0.39195780  | 1.14050339  |
| H | -10.39224487 | 0.44494680  | 2.16200839  |
| C | -8.76512587  | 0.90069080  | 0.81952939  |
| C | -8.29520087  | 0.83424780  | -0.49265061 |
| H | -7.31322087  | 1.22769580  | -0.73998061 |
| C | -7.42972887  | 4.94914080  | -6.44601061 |
| C | -8.60091687  | 5.40503980  | -7.06975661 |
| H | -9.34200487  | 4.68226480  | -7.40004561 |
| C | -8.81527187  | 6.76972780  | -7.27119561 |
| C | -7.86253087  | 7.69938880  | -6.84989461 |
| H | -8.02918887  | 8.76173780  | -7.00669461 |
| C | -6.69550587  | 7.25712280  | -6.22335361 |



|   |             |             |              |
|---|-------------|-------------|--------------|
| C | -6.48141087 | 5.89257880  | -6.02098561  |
| H | -5.57762087 | 5.55087080  | -5.52403761  |
| C | -1.02570087 | -2.60200220 | -10.22745561 |
| C | -2.28816587 | -3.20502420 | -10.54439761 |
| H | -2.42400387 | -4.15320420 | -11.04459861 |
| C | -3.26076387 | -2.36361120 | -10.09226161 |
| C | -2.59700887 | -1.21471720 | -9.53033361  |
| C | -3.22865887 | -0.06520420 | -8.97814361  |
| C | -2.52910687 | 1.15167880  | -9.10165361  |
| C | -3.17958487 | 2.41987580  | -8.91267361  |
| C | -2.33292487 | 3.37826980  | -9.41677761  |
| H | -2.48189087 | 4.44741680  | -9.45723061  |
| C | -1.14153087 | 2.69452880  | -9.82049161  |
| C | 0.21126413  | -3.24974720 | -10.27687061 |
| C | 0.29909913  | -4.66915120 | -10.72341861 |
| C | 1.15157813  | -5.01821220 | -11.78533161 |
| H | 1.72627113  | -4.24017020 | -12.27949661 |
| C | 1.25320213  | -6.34155420 | -12.21455961 |
| C | 0.51228513  | -7.34322320 | -11.58366761 |
| H | 0.59325613  | -8.37465120 | -11.91615361 |
| C | -0.32950587 | -7.01230920 | -10.51963561 |
| C | -0.43590787 | -5.68808320 | -10.09329361 |

|    |              |             |             |
|----|--------------|-------------|-------------|
| H  | -1.07830287  | -5.43756120 | -9.25442561 |
| Ni | -7.02835287  | 0.12257380  | -5.93532961 |
| Ni | 0.12120313   | 0.03556880  | -9.62282661 |
| N  | -6.34504687  | -1.26391520 | -7.11467461 |
| N  | -7.91731287  | -1.19825420 | -4.83186661 |
| N  | -7.77370987  | 1.52779580  | -4.83263361 |
| N  | -6.09985987  | 1.42288480  | -6.99716361 |
| N  | -1.23641587  | -1.34324520 | -9.68464961 |
| N  | -1.26630387  | 1.33940180  | -9.60223061 |
| C  | -8.23173287  | -4.53220520 | -6.58845461 |
| C  | -7.32590687  | -5.59530620 | -6.74059661 |
| H  | -6.26006587  | -5.39699020 | -6.67544761 |
| C  | -7.78249087  | -6.89646220 | -6.95490961 |
| C  | -9.15249987  | -7.15857420 | -7.02179761 |
| H  | -9.50749887  | -8.17180820 | -7.18996161 |
| C  | -10.06365887 | -6.11160220 | -6.86734861 |
| C  | -9.60744587  | -4.81136720 | -6.64838661 |
| H  | -10.31785987 | -3.99783120 | -6.53142561 |
| C  | 5.64144713   | 1.23556980  | -8.11094361 |
| C  | 5.72717713   | 2.38482480  | -8.98194361 |
| C  | 6.70124113   | 3.19119880  | -8.47975061 |
| H  | 7.04954313   | 4.12865780  | -8.88872461 |

|   |            |             |             |
|---|------------|-------------|-------------|
| C | 7.18901813 | 2.57348180  | -7.28073761 |
| C | 8.00478513 | 3.20674580  | -6.34474961 |
| C | 8.33712313 | 2.59840580  | -5.12442161 |
| C | 8.85041213 | 3.29949380  | -3.97735161 |
| H | 9.05474313 | 4.35959480  | -3.94050861 |
| C | 8.97309113 | 2.38384980  | -2.97722261 |
| H | 9.30813813 | 2.54643480  | -1.96355561 |
| C | 8.59754213 | 1.10827680  | -3.53061861 |
| C | 8.79767913 | -0.12553820 | -2.90545261 |
| C | 8.61337713 | -1.32903020 | -3.59880261 |
| C | 9.12362113 | -2.60241620 | -3.15952261 |
| H | 9.64293413 | -2.77084820 | -2.22740661 |
| C | 8.85309513 | -3.49988520 | -4.14602161 |
| H | 9.08475413 | -4.55474120 | -4.17295361 |
| C | 8.12782813 | -2.78997420 | -5.16742761 |
| C | 7.46369713 | -3.41171920 | -6.22940361 |
| C | 6.52671513 | -2.72444220 | -7.00560161 |
| C | 5.52905813 | -3.35914620 | -7.81480861 |
| H | 5.44872813 | -4.42245020 | -7.98528461 |
| C | 4.67947913 | -2.36808820 | -8.23377161 |
| C | 5.24235913 | -1.11928320 | -7.78263161 |
| C | 4.78786913 | 0.11471580  | -8.29321661 |

|   |             |             |              |
|---|-------------|-------------|--------------|
| C | 9.31613013  | -0.18064920 | -1.50610961  |
| C | 10.58415313 | 0.32253580  | -1.17118361  |
| H | 11.20524113 | 0.75720780  | -1.94909161  |
| C | 11.05529313 | 0.25272980  | 0.14054839   |
| C | 10.26759713 | -0.32132720 | 1.14060639   |
| H | 10.63450313 | -0.37436420 | 2.16211339   |
| C | 9.00740313  | -0.83004620 | 0.81959139   |
| C | 8.53749513  | -0.76354020 | -0.49259161  |
| H | 7.55551813  | -1.15697720 | -0.73995361  |
| C | 7.67210313  | -4.87815120 | -6.44615861  |
| C | 8.84330613  | -5.33401820 | -7.06990161  |
| H | 9.58439913  | -4.61122520 | -7.40013861  |
| C | 9.05766613  | -6.69869520 | -7.27140561  |
| C | 8.10491813  | -7.62837820 | -6.85017061  |
| H | 8.27158113  | -8.69072020 | -7.00701961  |
| C | 6.93787913  | -7.18614520 | -6.22363161  |
| C | 6.72377813  | -5.82161220 | -6.02120061  |
| H | 5.81997713  | -5.47993020 | -5.52425461  |
| C | 1.26811313  | 2.67316780  | -10.22732061 |
| C | 2.53058313  | 3.27620380  | -10.54422061 |
| H | 2.66642613  | 4.22440680  | -11.04437761 |
| C | 3.50317613  | 2.43477080  | -10.09211161 |

|   |             |             |              |
|---|-------------|-------------|--------------|
| C | 2.83941413  | 1.28585080  | -9.53024361  |
| C | 3.47105913  | 0.13631080  | -8.97810161  |
| C | 2.77150813  | -1.08056620 | -9.10167861  |
| C | 3.42198413  | -2.34877120 | -8.91275061  |
| C | 2.57532913  | -3.30714220 | -9.41690661  |
| H | 2.72429613  | -4.37628820 | -9.45740761  |
| C | 1.38394013  | -2.62338220 | -9.82060261  |
| C | 0.03115013  | 3.32091380  | -10.27671961 |
| C | -0.05668187 | 4.74033880  | -10.72320561 |
| C | -0.90914887 | 5.08944580  | -11.78511161 |
| H | -1.48383587 | 4.31142580  | -12.27931861 |
| C | -1.01076987 | 6.41280680  | -12.21428161 |
| C | -0.26986087 | 7.41444880  | -11.58333661 |
| H | -0.35082887 | 8.44589180  | -11.91577761 |
| C | 0.57191813  | 7.08348780  | -10.51930961 |
| C | 0.67831713  | 5.75924380  | -10.09302661 |
| H | 1.32070213  | 5.50868380  | -9.25416161  |
| N | 6.58742413  | 1.33493480  | -7.11453961  |
| N | 8.15966413  | 1.26916580  | -4.83171661  |
| N | 8.01605913  | -1.45688320 | -4.83261361  |
| N | 6.34223613  | -1.35187020 | -6.99715761  |
| N | 1.47882313  | 1.41438580  | -9.68457061  |

|    |              |             |              |
|----|--------------|-------------|--------------|
| N  | 1.50871113   | -1.26826520 | -9.60227761  |
| C  | 8.47410413   | 4.60319980  | -6.58814461  |
| C  | 7.56828013   | 5.66630680  | -6.74025061  |
| H  | 6.50243813   | 5.46798780  | -6.67512361  |
| C  | 8.02486613   | 6.96747280  | -6.95449761  |
| C  | 9.39487513   | 7.22958880  | -7.02135661  |
| H  | 9.74987613   | 8.24283080  | -7.18946961  |
| C  | 10.30603313  | 6.18260980  | -6.86694361  |
| C  | 9.84981813   | 4.88236480  | -6.64804661  |
| H  | 10.56023013  | 4.06882380  | -6.53111461  |
| Ni | 7.27071613   | -0.05160920 | -5.93525161  |
| H  | -9.72652987  | 7.10523880  | -7.75929261  |
| H  | -5.95176787  | 7.97433080  | -5.88613061  |
| H  | -8.14458187  | 1.34844180  | 1.59126639   |
| H  | -11.79941087 | -0.57110620 | 0.37899339   |
| H  | -1.66815987  | 6.66047980  | -13.04348961 |
| H  | 1.14208913   | 7.85840680  | -10.01363261 |
| H  | 7.30865913   | 7.77784680  | -7.06238461  |
| H  | 11.37412213  | 6.37671380  | -6.91888661  |
| H  | 12.04169313  | 0.64177380  | 0.37916539   |
| H  | 8.38684813   | -1.27783320 | 1.59129839   |
| H  | 9.96893613   | -7.03418020 | -7.75949961  |

|   |              |             |              |
|---|--------------|-------------|--------------|
| H | 6.19413513   | -7.90337120 | -5.88646061  |
| H | 1.91060213   | -6.58919020 | -13.04377161 |
| H | -0.89968287  | -7.78725020 | -10.01399961 |
| H | -11.13174687 | -6.30570220 | -6.91931361  |
| H | -7.06628287  | -7.70683020 | -7.06282461  |
| C | 4.97997713   | 2.56807580  | -10.26185861 |
| H | 5.32686013   | 1.81916180  | -10.99283661 |
| H | 5.21832913   | 3.54775980  | -10.68955661 |
| C | -4.73756387  | -2.49690620 | -10.26203361 |
| H | -4.97590987  | -3.47657020 | -10.68978161 |
| H | -5.08443787  | -1.74795820 | -10.99297961 |

**6-anti**

symmetry c1

|   |             |             |             |
|---|-------------|-------------|-------------|
| C | -5.61841490 | -1.41379555 | -8.77788141 |
| C | -5.67985390 | -2.62028055 | -9.57267241 |
| C | -6.77128090 | -3.33007755 | -9.14599841 |
| H | -7.10405490 | -4.27142655 | -9.55395541 |
| C | -7.31665990 | -2.63448855 | -8.03311241 |
| C | -8.23062590 | -3.19748955 | -7.13561841 |
| C | -8.55698790 | -2.56781955 | -5.92742241 |
| C | -9.13944490 | -3.22993655 | -4.78963441 |
| H | -9.43163690 | -4.26951255 | -4.76157441 |

|   |              |             |             |
|---|--------------|-------------|-------------|
| C | -9.18782290  | -2.31410455 | -3.78314441 |
| H | -9.53914790  | -2.45515955 | -2.77181241 |
| C | -8.70544590  | -1.06983055 | -4.32685341 |
| C | -8.81029490  | 0.17705745  | -3.69817241 |
| C | -8.57836690  | 1.36227745  | -4.40635641 |
| C | -9.02012090  | 2.66488445  | -3.97584641 |
| H | -9.48923090  | 2.87438945  | -3.02559641 |
| C | -8.77091690  | 3.52615945  | -4.99952341 |
| H | -8.97222490  | 4.58649845  | -5.04594941 |
| C | -8.12011290  | 2.76508245  | -6.03539841 |
| C | -7.50426090  | 3.33122245  | -7.15853541 |
| C | -6.59589490  | 2.60303945  | -7.93173341 |
| C | -5.63250290  | 3.19589845  | -8.81078741 |
| H | -5.58015590  | 4.24370245  | -9.06569341 |
| C | -4.76461990  | 2.19669445  | -9.16332141 |
| C | -5.28040290  | 0.97015045  | -8.60658841 |
| C | -4.77494890  | -0.28864655 | -9.00694441 |
| C | -9.29314690  | 0.26924245  | -2.28826541 |
| C | -10.58756390 | -0.13784055 | -1.92519241 |
| H | -11.25712490 | -0.52443555 | -2.68817241 |
| C | -11.02295390 | -0.03267655 | -0.60354641 |
| C | -10.17249290 | 0.48090045  | 0.37782859  |



|   |              |             |              |
|---|--------------|-------------|--------------|
| H | -10.51166590 | 0.56127545  | 1.40703959   |
| C | -8.88540090  | 0.89426845  | 0.02826659   |
| C | -8.45073890  | 0.79297745  | -1.29387841  |
| H | -7.44771990  | 1.11203245  | -1.56313741  |
| C | -7.72820790  | 4.78377345  | -7.43829941  |
| C | -8.95519890  | 5.20965545  | -7.96995741  |
| H | -9.72422790  | 4.47321745  | -8.18656841  |
| C | -9.18889790  | 6.56164545  | -8.22670641  |
| C | -8.20110990  | 7.50925045  | -7.95135841  |
| H | -8.38312790  | 8.56182945  | -8.15073941  |
| C | -6.97926590  | 7.09774045  | -7.41497441  |
| C | -6.74477590  | 5.74576245  | -7.15867441  |
| H | -5.79807390  | 5.42983645  | -6.72927241  |
| C | -1.20548490  | -2.75817455 | -11.06448841 |
| C | -2.43612990  | -3.43515455 | -11.28100741 |
| H | -2.58178390  | -4.38676755 | -11.76761741 |
| C | -3.42014290  | -2.68155455 | -10.69180941 |
| C | -2.79958190  | -1.47564155 | -10.19878841 |
| C | -3.45820690  | -0.31792955 | -9.68836041  |
| C | -2.80954190  | 0.91602745  | -9.92592441  |
| C | -3.51363090  | 2.16842945  | -9.84816041  |
| C | -2.71131990  | 3.11886445  | -10.42929741 |

|    |             |             |              |
|----|-------------|-------------|--------------|
| H  | -2.90692090 | 4.17347545  | -10.55653041 |
| C  | -1.48486690 | 2.45933045  | -10.76361841 |
| C  | 0.06234110  | -3.33827555 | -11.22170741 |
| C  | 0.20026610  | -4.71544755 | -11.77495241 |
| C  | 1.00354310  | -4.92784855 | -12.90881041 |
| H  | 1.49573810  | -4.07934455 | -13.37534141 |
| C  | 1.15736310  | -6.20647255 | -13.44442841 |
| C  | 0.52147810  | -7.29779355 | -12.84892141 |
| H  | 0.64210010  | -8.29428155 | -13.26509641 |
| C  | -0.26757090 | -7.10246055 | -11.71348141 |
| C  | -0.42773790 | -5.82320355 | -11.18052341 |
| H  | -1.02794390 | -5.68004155 | -10.28709941 |
| C  | -4.80725390 | -3.14619355 | -10.62781041 |
| Ni | -7.32745490 | -0.00021955 | -6.73898141  |
| Ni | -0.13219790 | -0.11740455 | -10.43525341 |
| N  | -6.65175490 | -1.42486255 | -7.86611641  |
| N  | -8.27668790 | -1.25838955 | -5.62405241  |
| N  | -8.02868690 | 1.44273945  | -5.66671341  |
| N  | -6.37932790 | 1.23844045  | -7.83235641  |
| N  | -1.45141990 | -1.52529055 | -10.47396241 |
| N  | -1.55641890 | 1.12217745  | -10.43605941 |
| O  | -5.19365190 | -4.06111355 | -11.35736741 |

|   |              |             |             |
|---|--------------|-------------|-------------|
| C | -8.80210590  | -4.55163155 | -7.39701141 |
| C | -7.98777090  | -5.69258755 | -7.48932341 |
| H | -6.91343990  | -5.59138355 | -7.36693141 |
| C | -8.54735490  | -6.95012055 | -7.71783341 |
| C | -9.92957890  | -7.08918955 | -7.85844741 |
| H | -10.36423090 | -8.06842655 | -8.03988241 |
| C | -10.75049190 | -5.96369955 | -7.76204741 |
| C | -10.19234990 | -4.70679555 | -7.52797541 |
| H | -10.83217190 | -3.83173755 | -7.45664741 |
| C | 5.35403110   | 1.17883845  | -8.77780041 |
| C | 5.41549010   | 2.38536045  | -9.57253541 |
| C | 6.50694910   | 3.09510445  | -9.14584941 |
| H | 6.83973610   | 4.03646645  | -9.55376341 |
| C | 7.05234610   | 2.39943145  | -8.03302541 |
| C | 7.96637210   | 2.96234745  | -7.13553641 |
| C | 8.29270810   | 2.33263445  | -5.92735741 |
| C | 8.87523110   | 2.99469245  | -4.78956841 |
| H | 9.16753210   | 4.03423845  | -4.76151141 |
| C | 8.92350310   | 2.07886045  | -3.78307441 |
| H | 9.27483510   | 2.21988045  | -2.77173941 |
| C | 8.44100210   | 0.83463245  | -4.32678241 |
| C | 8.54571510   | -0.41226455 | -3.69809641 |

|   |             |             |             |
|---|-------------|-------------|-------------|
| C | 8.31373310  | -1.59746355 | -4.40629741 |
| C | 8.75537610  | -2.90010555 | -3.97577341 |
| H | 9.22440410  | -3.10965455 | -3.02549341 |
| C | 8.50619810  | -3.76134955 | -4.99948541 |
| H | 8.70744810  | -4.82169855 | -5.04591341 |
| C | 7.85551310  | -3.00021655 | -6.03539641 |
| C | 7.23971510  | -3.56629955 | -7.15859241 |
| C | 6.33141710  | -2.83806055 | -7.93181941 |
| C | 5.36805210  | -3.43085455 | -8.81094841 |
| H | 5.31569610  | -4.47864255 | -9.06591341 |
| C | 4.50019810  | -2.43161655 | -9.16346041 |
| C | 5.01597910  | -1.20511255 | -8.60663641 |
| C | 4.51054710  | 0.05371645  | -9.00692341 |
| C | 9.02848710  | -0.50449055 | -2.28816441 |
| C | 10.32292710 | -0.09753855 | -1.92502641 |
| H | 10.99256610 | 0.28898445  | -2.68797241 |
| C | 10.75823610 | -0.20274255 | -0.60335541 |
| C | 9.90766910  | -0.71622855 | 0.37797559  |
| H | 10.24678010 | -0.79663455 | 1.40720459  |
| C | 8.62055310  | -1.12946455 | 0.02834759  |
| C | 8.18597110  | -1.02813355 | -1.29382141 |
| H | 7.18293510  | -1.34708855 | -1.56313341 |

|   |             |             |              |
|---|-------------|-------------|--------------|
| C | 7.46363210  | -5.01884855 | -7.43838941  |
| C | 8.69065610  | -5.44475655 | -7.96995041  |
| H | 9.45973110  | -4.70833955 | -8.18646641  |
| C | 8.92432810  | -6.79674655 | -8.22672641  |
| C | 7.93648010  | -7.74432555 | -7.95150041  |
| H | 8.11847810  | -8.79690355 | -8.15090241  |
| C | 6.71460510  | -7.33278955 | -7.41521041  |
| C | 6.48014010  | -5.98081155 | -7.15888341  |
| H | 5.53341310  | -5.66486655 | -6.72955241  |
| C | 0.94109010  | 2.52342445  | -11.06424941 |
| C | 2.17173510  | 3.20042445  | -11.28070541 |
| H | 2.31738910  | 4.15208045  | -11.76723141 |
| C | 3.15575310  | 2.44675845  | -10.69160141 |
| C | 2.53518710  | 1.24080945  | -10.19867341 |
| C | 3.19380810  | 0.08305445  | -9.68834041  |
| C | 2.54514110  | -1.15088155 | -9.92600341  |
| C | 3.24922410  | -2.40329355 | -9.84832941  |
| C | 2.44691710  | -3.35367855 | -10.42955241 |
| H | 2.64251510  | -4.40827955 | -10.55686841 |
| C | 1.22047110  | -2.69411255 | -10.76383741 |
| C | -0.32673590 | 3.10353645  | -11.22142441 |
| C | -0.46466090 | 4.48075445  | -11.77455641 |

|   |             |             |              |
|---|-------------|-------------|--------------|
| C | -1.26792190 | 4.69324445  | -12.90840941 |
| H | -1.76010290 | 3.84477445  | -13.37501841 |
| C | -1.42174190 | 5.97191145  | -13.44392241 |
| C | -0.78587390 | 7.06318745  | -12.84831441 |
| H | -0.90649690 | 8.05970945  | -13.26440841 |
| C | 0.00315810  | 6.86776545  | -11.71287941 |
| C | 0.16332710  | 5.58846445  | -11.18002541 |
| H | 0.76352010  | 5.44523245  | -10.28660441 |
| C | 4.54287810  | 2.91135545  | -10.62762041 |
| N | 6.38740010  | 1.18982445  | -7.86606741  |
| N | 8.01228310  | 1.02322945  | -5.62398841  |
| N | 7.76413710  | -1.67787755 | -5.66669341  |
| N | 6.11486910  | -1.47346255 | -7.83238041  |
| N | 1.18702410  | 1.29048645  | -10.47383741 |
| N | 1.29202310  | -1.35698655 | -10.43616741 |
| O | 4.92921710  | 3.82643545  | -11.35700741 |
| C | 8.53794410  | 4.31645845  | -7.39690941  |
| C | 7.72368610  | 5.45747445  | -7.48914841  |
| H | 6.64935210  | 5.35634145  | -7.36672541  |
| C | 8.28335310  | 6.71497645  | -7.71762941  |
| C | 9.66558210  | 6.85395145  | -7.85828141  |
| H | 10.10030010 | 7.83316445  | -8.03969341  |

|    |              |             |              |
|----|--------------|-------------|--------------|
| C  | 10.48641810  | 5.72839845  | -7.76195041  |
| C  | 9.92819410   | 4.47152645  | -7.52790841  |
| H  | 10.56795510  | 3.59641945  | -7.45662941  |
| Ni | 7.06301510   | -0.23486855 | -6.73895541  |
| H  | -10.14293990 | 6.87312545  | -8.64361141  |
| H  | -6.20805790  | 7.82954245  | -7.18952741  |
| H  | -8.21638190  | 1.29485545  | 0.78521259   |
| H  | -12.03015390 | -0.34675655 | -0.34272141  |
| H  | -2.03725390  | 6.11413945  | -14.32808141 |
| H  | 0.49252010   | 7.71286245  | -11.23628241 |
| H  | 7.63769810   | 7.58661545  | -7.78199441  |
| H  | 11.56309510  | 5.82705845  | -7.87161341  |
| H  | 11.76545410  | 0.11123545  | -0.34247841  |
| H  | 7.95145410   | -1.52998055 | 0.78525959   |
| H  | 9.87839610   | -7.10824655 | -8.64355641  |
| H  | 5.94335010   | -8.06457055 | -7.18985641  |
| H  | 1.77288710   | -6.34863155 | -14.32858841 |
| H  | -0.75694690  | -7.94759355 | -11.23696341 |
| H  | -11.82716490 | -6.06243055 | -7.87168141  |
| H  | -7.90163990  | -7.82170955 | -7.78225141  |

**7-anti**

symmetry c1

|   |              |             |             |
|---|--------------|-------------|-------------|
| C | -5.43076925  | -1.68546741 | -6.62085073 |
| C | -5.37631325  | -2.89565741 | -7.41381373 |
| C | -6.38619625  | -3.71789241 | -6.98519573 |
| H | -6.61546825  | -4.68998241 | -7.39336973 |
| C | -7.04158625  | -3.05497941 | -5.90847773 |
| C | -8.03635825  | -3.65437141 | -5.10835673 |
| C | -8.79245125  | -2.99505541 | -4.11742573 |
| C | -9.66461325  | -3.63538541 | -3.16446173 |
| H | -9.81003725  | -4.70126741 | -3.06749273 |
| C | -10.23040025 | -2.64570841 | -2.41490373 |
| H | -10.92501125 | -2.75645241 | -1.59530073 |
| C | -9.72661525  | -1.39004941 | -2.91813273 |
| C | -10.14221125 | -0.11373341 | -2.48113773 |
| C | -9.65438925  | 1.10100159  | -3.00121673 |
| C | -10.21997725 | 2.40443259  | -2.73429573 |
| H | -11.06712625 | 2.59769859  | -2.09240073 |
| C | -9.51158325  | 3.30562559  | -3.47099973 |
| H | -9.67177225  | 4.37150859  | -3.53952273 |
| C | -8.48771225  | 2.56481059  | -4.17341773 |
| C | -7.49825125  | 3.12627659  | -5.00578973 |



|   |              |             |             |
|---|--------------|-------------|-------------|
| C | -6.47783625  | 2.40069959  | -5.65564173 |
| C | -5.33711625  | 3.01855559  | -6.26358673 |
| H | -5.15437325  | 4.08052859  | -6.33009173 |
| C | -4.50808125  | 2.00178559  | -6.65957473 |
| C | -5.16050325  | 0.75298359  | -6.35347773 |
| C | -4.61351025  | -0.50294841 | -6.75729073 |
| C | -11.20223025 | -0.03915841 | -1.42935573 |
| C | -12.49169225 | -0.54741941 | -1.65964573 |
| H | -12.72098925 | -0.99602741 | -2.62199073 |
| C | -13.47707225 | -0.46645041 | -0.67507973 |
| C | -13.19080025 | 0.12152259  | 0.55891227  |
| H | -13.95796225 | 0.18293459  | 1.32603427  |
| C | -11.91350625 | 0.63148259  | 0.80046527  |
| C | -10.92923625 | 0.55453659  | -0.18563673 |
| H | -9.93472525  | 0.94693559  | 0.00699427  |
| C | -7.49514525  | 4.61301359  | -5.17815373 |
| C | -7.72574325  | 5.18088059  | -6.44202173 |
| H | -7.91268425  | 4.52799559  | -7.28992973 |
| C | -7.72646125  | 6.56583659  | -6.61281273 |
| C | -7.49096025  | 7.40765059  | -5.52383673 |
| H | -7.48967625  | 8.48611659  | -5.65693873 |
| C | -7.25489625  | 6.85551359  | -4.26299073 |

|   |             |             |              |
|---|-------------|-------------|--------------|
| C | -7.25816225 | 5.47058659  | -4.09128273  |
| H | -7.06428125 | 5.04413559  | -3.11114673  |
| C | -0.81813025 | -3.02826941 | -8.30800173  |
| C | -2.01580025 | -3.68432741 | -8.71686173  |
| H | -2.10740925 | -4.63597741 | -9.21703873  |
| C | -3.06364925 | -2.89020941 | -8.32309273  |
| C | -2.50799325 | -1.69733541 | -7.72208773  |
| C | -3.20954525 | -0.51402141 | -7.28303373  |
| C | -2.51646125 | 0.73361159  | -7.36444373  |
| C | -3.18723625 | 1.99280759  | -7.18358673  |
| C | -2.30360525 | 2.99372359  | -7.50886873  |
| H | -2.47430425 | 4.05966259  | -7.48215273  |
| C | -1.06657125 | 2.35028759  | -7.82562273  |
| C | 0.47121875  | -3.60001341 | -8.36750573  |
| C | 0.58782275  | -5.02390941 | -8.80070273  |
| C | 1.40359475  | -5.36577241 | -9.89365773  |
| H | 1.93223675  | -4.58064441 | -10.42621473 |
| C | 1.52288375  | -6.69225241 | -10.30768873 |
| C | 0.83807175  | -7.70348541 | -9.63034073  |
| H | 0.93229275  | -8.73714241 | -9.95194373  |
| C | 0.03188675  | -7.37927141 | -8.53713073  |
| C | -0.09440325 | -6.05200041 | -8.12718673  |

|   |              |             |             |
|---|--------------|-------------|-------------|
| H | -0.71320425  | -5.80551241 | -7.26960273 |
| C | -4.44885025  | -3.33619241 | -8.45818873 |
| N | -6.49290825  | -1.79007441 | -5.75227973 |
| N | -8.82357825  | -1.63536841 | -3.92763773 |
| N | -8.60970525  | 1.22849559  | -3.88527073 |
| N | -6.35341625  | 1.02434159  | -5.72142373 |
| N | -1.14001925  | -1.79575641 | -7.76503873 |
| N | -1.21123125  | 0.98314959  | -7.71767073 |
| O | -4.77704125  | -4.17852041 | -9.29298073 |
| C | -8.30646425  | -5.11011541 | -5.31354773 |
| C | -7.29366025  | -6.06639541 | -5.12769173 |
| H | -6.30321625  | -5.73799941 | -4.82668373 |
| C | -7.55290725  | -7.42485541 | -5.31069173 |
| C | -8.82728725  | -7.85191041 | -5.68936473 |
| H | -9.02770525  | -8.90972641 | -5.83635373 |
| C | -9.84245425  | -6.91195441 | -5.87984573 |
| C | -9.58585225  | -5.55412641 | -5.68925273 |
| H | -10.37541025 | -4.82485441 | -5.84582573 |
| C | 6.05475375   | 0.98828459  | -6.57018973 |
| C | 6.00632175   | 2.22184359  | -7.32931273 |
| C | 7.05108575   | 3.00561259  | -6.91417273 |
| H | 7.29056375   | 3.98211659  | -7.30525073 |

|   |             |             |             |
|---|-------------|-------------|-------------|
| C | 7.72337975  | 2.30002659  | -5.87636573 |
| C | 8.76229475  | 2.85726759  | -5.10246473 |
| C | 9.52622475  | 2.16688459  | -4.13976373 |
| C | 10.45327775 | 2.77216959  | -3.21578973 |
| H | 10.64651875 | 3.83112659  | -3.12718373 |
| C | 10.99806575 | 1.76129759  | -2.47951373 |
| H | 11.72124875 | 1.84390759  | -1.68155673 |
| C | 10.42555475 | 0.52705659  | -2.96200973 |
| C | 10.78751775 | -0.76271741 | -2.51759373 |
| C | 10.23762775 | -1.95806141 | -3.01798473 |
| C | 10.69907375 | -3.28908941 | -2.69021273 |
| H | 11.50674575 | -3.52001541 | -2.01100173 |
| C | 9.93841075  | -4.16310341 | -3.40707673 |
| H | 9.99961475  | -5.24167941 | -3.41421773 |
| C | 9.00013375  | -3.37432341 | -4.17330773 |
| C | 7.98740775  | -3.89871341 | -4.99976373 |
| C | 6.99796175  | -3.14186141 | -5.65583473 |
| C | 5.88600475  | -3.72058641 | -6.34891773 |
| H | 5.70883775  | -4.77609641 | -6.49055773 |
| C | 5.08097975  | -2.67965341 | -6.73052573 |
| C | 5.73206775  | -1.45080841 | -6.34618173 |
| C | 5.21280875  | -0.17404741 | -6.72489373 |

|   |             |             |             |
|---|-------------|-------------|-------------|
| C | 11.85060475 | -0.87280041 | -1.47075773 |
| C | 13.16831375 | -0.46148341 | -1.73060273 |
| H | 13.41628475 | -0.06316341 | -2.71038773 |
| C | 14.15658475 | -0.57281041 | -0.75172673 |
| C | 13.84458175 | -1.09497441 | 0.50535027  |
| H | 14.61400875 | -1.18031541 | 1.26790527  |
| C | 12.53842775 | -1.50780241 | 0.77627527  |
| C | 11.55083475 | -1.39987141 | -0.20376973 |
| H | 10.53417075 | -1.71660341 | 0.01145227  |
| C | 7.93500175  | -5.39122941 | -5.14512673 |
| C | 8.87025375  | -6.05704241 | -5.95189073 |
| H | 9.62402375  | -5.47859541 | -6.47905073 |
| C | 8.83473275  | -7.44625141 | -6.08530373 |
| C | 7.86484775  | -8.19130541 | -5.41159673 |
| H | 7.83727075  | -9.27268941 | -5.51500273 |
| C | 6.93105675  | -7.53951341 | -4.60329873 |
| C | 6.96617875  | -6.15027441 | -4.47067673 |
| H | 6.24237475  | -5.64527141 | -3.83690773 |
| C | 1.42296775  | 2.44719259  | -8.12029773 |
| C | 2.61937675  | 3.12118059  | -8.50227873 |
| H | 2.70999775  | 4.09825659  | -8.95103173 |
| C | 3.66682475  | 2.29923459  | -8.16912073 |

|   |             |             |              |
|---|-------------|-------------|--------------|
| C | 3.11186575  | 1.07814259  | -7.62981173  |
| C | 3.81153175  | -0.12963741 | -7.25928573  |
| C | 3.11551975  | -1.36717741 | -7.41894373  |
| C | 3.77944875  | -2.63692941 | -7.29952473  |
| C | 2.90069575  | -3.61366541 | -7.70221873  |
| H | 3.06779975  | -4.68002641 | -7.73533973  |
| C | 1.67008675  | -2.94839041 | -7.99969873  |
| C | 0.13434775  | 3.02358359  | -8.14282273  |
| C | 0.02301475  | 4.47279959  | -8.48345173  |
| C | -0.78662325 | 4.88844359  | -9.55516173  |
| H | -1.31586625 | 4.14179659  | -10.13989073 |
| C | -0.89852425 | 6.23953059  | -9.88260773  |
| C | -0.21225425 | 7.20156459  | -9.13834073  |
| H | -0.30075825 | 8.25434559  | -9.39246973  |
| C | 0.58838875  | 6.80342159  | -8.06568773  |
| C | 0.70756475  | 5.45175959  | -7.74252773  |
| H | 1.32257775  | 5.14704359  | -6.90109573  |
| C | 5.05471375  | 2.72839759  | -8.32081373  |
| N | 7.14493775  | 1.04689459  | -5.73023973  |
| N | 9.50725775  | 0.80736659  | -3.94849073  |
| N | 9.20780075  | -2.04175741 | -3.92485073  |
| N | 6.89480275  | -1.76050141 | -5.67934373  |

|   |              |             |              |
|---|--------------|-------------|--------------|
| N | 1.74397275   | 1.18364859  | -7.65349273  |
| N | 1.81499475   | -1.59113641 | -7.80689573  |
| O | 5.37330175   | 3.60473159  | -9.12401773  |
| C | 9.07484375   | 4.30588459  | -5.30361373  |
| C | 8.10872775   | 5.29510659  | -5.05427873  |
| H | 7.12281375   | 4.99833859  | -4.70868073  |
| C | 8.40858075   | 6.64588659  | -5.23254873  |
| C | 9.67743975   | 7.03188659  | -5.66935173  |
| H | 9.90928175   | 8.08378059  | -5.81255673  |
| C | 10.64635575  | 6.05863559  | -5.92285673  |
| C | 10.34936475  | 4.70825459  | -5.73731873  |
| H | 11.10278775  | 3.95306359  | -5.94199773  |
| H | -7.91380725  | 6.98640959  | -7.59724073  |
| H | -7.06215525  | 7.50270559  | -3.41143573  |
| H | -11.68027025 | 1.08742359  | 1.75901827   |
| H | -14.47075825 | -0.85852141 | -0.87508373  |
| H | -1.51905125  | 6.53961859  | -10.72272173 |
| H | 1.11978075   | 7.54575459  | -7.47629973  |
| H | 7.64987975   | 7.39660059  | -5.02846973  |
| H | 11.63408775  | 6.34948059  | -6.27039673  |
| H | 15.17202875  | -0.25557341 | -0.97396173  |
| H | 12.28530575  | -1.91172841 | 1.75294727   |

|    |              |             |              |
|----|--------------|-------------|--------------|
| H  | 9.56403275   | -7.94508841 | -6.71808473  |
| H  | 6.17559475   | -8.11203241 | -4.07163073  |
| H  | 2.14840075   | -6.93451741 | -11.16260773 |
| H  | -0.49826225  | -8.16059941 | -7.99924673  |
| H  | -10.83510525 | -7.23460341 | -6.18237573  |
| H  | -6.75821325  | -8.14959141 | -5.15550273  |
| Zn | -7.56247925  | -0.29615641 | -4.79911973  |
| Zn | 0.30125475   | -0.30686041 | -7.68870773  |
| Zn | 8.18005575   | -0.48285741 | -4.79929373  |

## References

1. P. Geerlings, F. De Proft and W. Langenaeker, *Chem. Rev.*, 2003, **103**, 1793-1874.
2. R. G. Parr and R. G. Pearson, *J. Am. Chem. Soc.*, 1983, **105**, 7512-7516.
3. W. Yang and R. G. Parr, *Proc. Nat. Acad. Sci.*, 1985, **82**, 6723-6726.
4. R. G. Parr, L. v. Szentpály and S. Liu, *J. Am. Chem. Soc.*, 1999, **121**, 1922-1924.
